# Supplementary material for: Safety and effectiveness of a Tai Chi-based cardiac rehabilitation programme for chronic coronary syndrom patients: study protocol for a randomised controlled trial
Source: PubMed Central journal article supplement — BMJ Open. 2020 Jul 5;10(7):e036061. doi: 10.1136/bmjopen-2019-036061 (PMC7337900; doi:10.1136/bmjopen-2019-036061), 2020-07-05
Supplement: bmjopen-2019-036061.draft_revisions.pdf [file bmjopen-2019-036061.draft_revisions.pdf]

# BMJ Open

BMJ Open is committed to open peer review. As part of this commitment we make the peer review history of every article we publish publicly available.

When an article is published we post the peer reviewers' comments and the authors' responses online. We also post the versions of the paper that were used during peer review. These are the versions that the peer review comments apply to.

The versions of the paper that follow are the versions that were submitted during the peer review process. They are not the versions of record or the final published versions. They should not be cited or distributed as the published version of this manuscript.

BMJ Open is an open access journal and the full, final, typeset and author-corrected version of record of the manuscript is available on our site with no access controls, subscription charges or pay-per-view fees (<http://bmjopen.bmj.com>).

If you have any questions on BMJ Open's open peer review process please email [info.bmjopen@bmj.com](mailto:info.bmjopen@bmj.com)

# BMJ Open

## Safety and Effectiveness of a TaiChi-based Cardiac Rehabilitation Program for Coronary Heart Disease Patients: Study Protocol for a Randomized Controlled Trial

|                               |                                                                                                                                                                                                                                                                                                                                                                                                                                                                                                                                                                                                                                                                                                                                                                                                                                                                                                                                                                                                                                                                                                                                                                                                                                                                                                                                                                                                                                                            |
|-------------------------------|------------------------------------------------------------------------------------------------------------------------------------------------------------------------------------------------------------------------------------------------------------------------------------------------------------------------------------------------------------------------------------------------------------------------------------------------------------------------------------------------------------------------------------------------------------------------------------------------------------------------------------------------------------------------------------------------------------------------------------------------------------------------------------------------------------------------------------------------------------------------------------------------------------------------------------------------------------------------------------------------------------------------------------------------------------------------------------------------------------------------------------------------------------------------------------------------------------------------------------------------------------------------------------------------------------------------------------------------------------------------------------------------------------------------------------------------------------|
| Journal:                      | <i>BMJ Open</i>                                                                                                                                                                                                                                                                                                                                                                                                                                                                                                                                                                                                                                                                                                                                                                                                                                                                                                                                                                                                                                                                                                                                                                                                                                                                                                                                                                                                                                            |
| Manuscript ID                 | bmjopen-2019-036061                                                                                                                                                                                                                                                                                                                                                                                                                                                                                                                                                                                                                                                                                                                                                                                                                                                                                                                                                                                                                                                                                                                                                                                                                                                                                                                                                                                                                                        |
| Article Type:                 | Protocol                                                                                                                                                                                                                                                                                                                                                                                                                                                                                                                                                                                                                                                                                                                                                                                                                                                                                                                                                                                                                                                                                                                                                                                                                                                                                                                                                                                                                                                   |
| Date Submitted by the Author: | 12-Dec-2019                                                                                                                                                                                                                                                                                                                                                                                                                                                                                                                                                                                                                                                                                                                                                                                                                                                                                                                                                                                                                                                                                                                                                                                                                                                                                                                                                                                                                                                |
| Complete List of Authors:     | <p>Ma, Jing; Military General Hospital of Beijing PLA, Department of Cardiovascular Medicine</p> <p>Zhang, Jian; Beijing Normal University, college of P.E and sports</p> <p>Li, Hua; Anzhen Community Health Service Center, Chaoyang District, Department of Cardiovascular Medicine</p> <p>Zhao, Lian; Beijing Shuili Hospital, Department of Cardiovascular Medicine</p> <p>Guo, Ai; Anzhen Community Health Service Center, Chaoyang District, Department of Cardiovascular Medicine</p> <p>Chen, Zai; Beijing Sport University, College of Wushu</p> <p>Yuan, Wen; Beijing Sport University, College of Wushu</p> <p>Gao, Tian; Beijing Normal University, College of Physical Education and Sports</p> <p>Li, Ya; Beijing Normal University, College of Physical Education and Sports</p> <p>Li, Cui; Beijing Sport University, College of Wushu</p> <p>Wang, Hong; Beijing Normal University, College of Physical Education and Sports</p> <p>Song, Bo; Beijing Normal University, College of Physical Education and Sports</p> <p>Lu, Yu; Beijing Normal University; Longyan University</p> <p>Cui, Mei; Beijing Normal University, College of Physical Education and Sports</p> <p>Wei, Qiu; Beijing Normal University, College of Physical Education and Sports</p> <p>Lyu, Shao; Beijing Normal University, College of Physical Education and Sports</p> <p>Yin, Heng; Beijing Normal University, College of Physical Education and Sports</p> |
| Keywords:                     | Coronary heart disease < CARDIOLOGY, Health & safety < HEALTH SERVICES ADMINISTRATION & MANAGEMENT, Cardiology < INTERNAL MEDICINE, Rehabilitation medicine < INTERNAL MEDICINE, MEDICAL EDUCATION & TRAINING, Clinical trials < THERAPEUTICS                                                                                                                                                                                                                                                                                                                                                                                                                                                                                                                                                                                                                                                                                                                                                                                                                                                                                                                                                                                                                                                                                                                                                                                                              |
|                               |                                                                                                                                                                                                                                                                                                                                                                                                                                                                                                                                                                                                                                                                                                                                                                                                                                                                                                                                                                                                                                                                                                                                                                                                                                                                                                                                                                                                                                                            |

1  
2  
3  
4  
5  
6  
7  
8  
9  
10  
11  
12  
13  
14  
15  
16  
17  
18  
19  
20  
21  
22  
23  
24  
25  
26  
27  
28  
29  
30  
31  
32  
33  
34  
35  
36  
37  
38  
39  
40  
41  
42  
43  
44  
45  
46  
47  
48  
49  
50  
51  
52  
53  
54  
55  
56  
57  
58  
59  
60

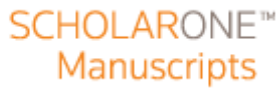

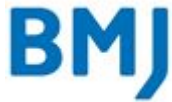

I, the Submitting Author has the right to grant and does grant on behalf of all authors of the Work (as defined in the below author licence), an exclusive licence and/or a non-exclusive licence for contributions from authors who are: i) UK Crown employees; ii) where BMJ has agreed a CC-BY licence shall apply, and/or iii) in accordance with the terms applicable for US Federal Government officers or employees acting as part of their official duties; on a worldwide, perpetual, irrevocable, royalty-free basis to BMJ Publishing Group Ltd ("BMJ") its licensees and where the relevant Journal is co-owned by BMJ to the co-owners of the Journal, to publish the Work in this journal and any other BMJ products and to exploit all rights, as set out in our [licence](#).

The Submitting Author accepts and understands that any supply made under these terms is made by BMJ to the Submitting Author unless you are acting as an employee on behalf of your employer or a postgraduate student of an affiliated institution which is paying any applicable article publishing charge ("APC") for Open Access articles. Where the Submitting Author wishes to make the Work available on an Open Access basis (and intends to pay the relevant APC), the terms of reuse of such Open Access shall be governed by a Creative Commons licence – details of these licences and which [Creative Commons](#) licence will apply to this Work are set out in our licence referred to above.

Other than as permitted in any relevant BMJ Author's Self Archiving Policies, I confirm this Work has not been accepted for publication elsewhere, is not being considered for publication elsewhere and does not duplicate material already published. I confirm all authors consent to publication of this Work and authorise the granting of this licence.

**ID :** 2019-036061

**Journal :** 《BMJ Open》

**(1) Article Title:**

Safety and Effectiveness of a TaiChi-based Cardiac Rehabilitation Program for Coronary Heart Disease Patients: Study Protocol for a Randomized Controlled Trial

**(2) First-Author**

Jing Ma , Dr  
Military General Hospital of Beijing PLA,  
Department of Cardiovascular Medicine  
No. 28, Fuxing road, Haidian district, Beijing  
Zip code: 100853 E-mail: [crystalma@126.com](mailto:crystalma@126.com)

**Co- First-Author**

Jianwei Zhang , PhD  
Beijing Normal University  
College of Physical Education and Sports  
No.19 Xijiekou wai street Haidian district, Beijing  
The People's Republic of China  
Zip Code: 100875  
E-mail: [13161615533@163.com](mailto:13161615533@163.com)

**(3) Co-authors**

Hua Li  
Anzhen Community Health Service Center, Chaoyang District , Beijing , China  
E-mail: [splawyer88@sina.com](mailto:splawyer88@sina.com)

Lianshan Zhao  
Beijing Shuili Hospital, Beijing , China  
E-mail: [zhaols1006@sina.com](mailto:zhaols1006@sina.com)

Aiying Guo  
Anzhen Community Health Service Center, Chaoyang District , Beijing , China  
E-mail: [229127866@qq.com](mailto:229127866@qq.com)

Zaihao Chen

College of Wushu, Beijing Sports University, Beijing, 100084, China.  
E-mail: 2455374274@qq.com

Wen Yuan

College of Wushu, Beijing Sports University, Beijing, 100084, China.  
E-mail: [2788127942@qq.com](mailto:2788127942@qq.com)

Tianming Gao

College of P.E. and Sports, Beijing Normal University, Beijing, 100875, China. E-mail: 1714130371@qq.com

Yameng Li

College of P.E. and Sports, Beijing Normal University, Beijing, 100875, China. E-mail: [1439702398@qq.com](mailto:1439702398@qq.com)

Cuihan Li, Dr

College of Wushu, Beijing Sports University, Beijing, 100084, China.  
E-mail: 569630979@qq.com

Hongwei Wang

College of P.E. and Sports, Beijing Normal University, Beijing, 100875, China. E-mail: [13919437131@163.com](mailto:13919437131@163.com)

Bo Song

College of P.E. and Sports, Beijing Normal University, Beijing, 100875, China. E-mail: [645353652@qq.com](mailto:645353652@qq.com)

Yulong Lu

College of P.E. and Sports, Beijing Normal University, Beijing, 100875, China. E-mail: [34910476@qq.com](mailto:34910476@qq.com)

Meize Cui

College of P.E. and Sports, Beijing Normal University, Beijing, 100875, China. E-mail: [2217554936@qq.com](mailto:2217554936@qq.com)

Qiuyang Wei

College of P.E. and Sports, Beijing Normal University, Beijing, 100875, China. E-mail: 291610192@qq.com

#### **(4) Corresponding author**

Shaojun Lyu, Ph D

Beijing Normal University

College of Physical Education and Sports

No.19 Xijiekou wai street Haidian district, Beijing

The People's Republic of China

Zip Code: 100875

E-mail: [113121860699@163.com](mailto:113121860699@163.com)

Tel : +86 13121860699

### **Co -Corresponding author**

Hengchan Yin prof

Beijing Normal University

College of Physical Education and Sports

No.19 Xijiekou wai street Haidian district, Beijing

The People's Republic of China

Zip Code: 100875

E-mail: [yinhengchan@bnu.edu.cn](mailto:yinhengchan@bnu.edu.cn)

### **(5) Keywords**

Coronary heart disease; Complementary medicine; Healthcare; Cardiac rehabilitation;  
Clinical trials

**(6) Word count:** 5103 words

---

## Safety and Effectiveness of a TaiChi-based Cardiac Rehabilitation Program for Coronary Heart Disease Patients: Study Protocol for a Randomized Controlled Trial

**INTRODUCTION:** Preliminary evidence from clinical observations suggests that Tai Chi exercise may offer potential benefits for patients with coronary heart disease (CHD). However, the advantages for CHD patients to practice Tai Chi exercise as rehabilitation have not been rigorously tested and there is a lack of consensus on its benefits. This study aims to develop an innovative Tai Chi Cardiac Rehabilitation Program (TCCRP) for CHD patients and to assess the efficacy, safety and acceptability of the program.

**METHODS AND ANALYSIS:** We propose to conduct a multicenter randomized-controlled clinical trial comprising of 150 participants with CHD. The patients will be randomly assigned in a 1:1 ratio into either an intervention group or a control group. The intervention group will participate in a supervised TCCRP held 3 times a week for 3 months. The control group will receive supervised conventional exercise rehabilitation (CER) held 3 times a week for 3 months. After the 3-month intervention period, there will be a 3-month follow-up period with no active intervention in either group. The primary and secondary outcomes will be assessed at baseline, 1 month, 3 months and 6 months. Primary outcome measures will include a score of 36-Item Short Form Survey (SF-36) and Chinese Perceived Stress Scale (CPSS). The secondary outcome measures will include body composition, cardiopulmonary exercise test, respiratory muscle function, locomotor skills, echocardiogram, New York Heart Association (NYHA) classification, heart rate recovery time and laboratory examination. Other measures also include Seattle Angina Scale (SAQ), Pittsburgh Sleep Quality Index (PSQI), Patient Health Questionnaire-9 (PHQ-9), Generalized Anxiety Disorder-7 (GAD-7), Berg Balance Scale (BBS), Morse Fall Scale (MFS) and Kansas City Cardiomyopathy Questionnaire (KCCQ). All adverse events will be recorded and analyzed. Intention-to-treat analysis will be performed for participants who withdraw from the trial.



**ETHICS AND DISSEMINATION:** This study conforms to the principles of the Declaration of Helsinki and relevant ethical guidelines covering informed consent, confidentiality and data storage. Ethical approval has been obtained from the Ethics Committee of Chinese PLA General Hospital (approval number S2019-060-02).

All participants will be fully informed about the trial and will sign a consent form prior to participation. Findings from this study will be published and presented at conferences for widespread dissemination of the results.

Trial registration number: ClinicalTrials.gov identifier: NCT03936504

#### **STRENGTHENS AND LIMITATIONS OF THE STUDY:**

- TCCRCP is specifically designed for patients with CHD.
- Tai Chi exercise is easily performed and mastered at home as a cost-free rehabilitation program.
- Gentle exercise for CHD patients encourages patient compliance.
- It is difficult to monitor any additional physical activity and accurately track daily activity intensity of participants.
- The blinding of participants is unachievable in this trial; however, efforts will be made to ensure that the data is blinded.

**Keywords:** Tai Chi, Coronary heart disease, Safety, Effectiveness, Randomized controlled trial, Exercise rehabilitation.

#### **INTRODUCTION**

Coronary heart disease (CHD) remains the major cause of morbidity and mortality worldwide. CHD responsible for about one in every seven deaths; and, CHS is predicted to continue until 2030, accounting for 14% of all deaths globally.[1,2] Despite the use of effective Western medicine treatments, the incidence of CHD continues to rise and is associated with a high mortality rate. While cardiac rehabilitation comprising contemporary exercises is recommended for CHD patients, over 60% of CHD patients

1  
2  
3  
4 have been reported to decline current cardiac rehabilitation exercises as they perceive  
5 the physical exercise to be unpleasant, painful or impossible to perform in view of their  
6 conditions.[3] Consequently, there is an unmet need to develop an effective, yet feasible,  
7 alternative exercise therapy for CHD patients who don't participate in current cardiac  
8 rehabilitation exercises. Furthermore, an effective complementary is needed to be  
9 developed to improve the functional status and quality of life in CHD patients.

10  
11 The integration of Traditional Chinese medicine (TCM) with Western medicine to treat  
12 CHD has made great progress. As an effective complementary therapy, TCM has been  
13 demonstrated to improve the prognosis of CHD patients.[4] Tai Chi is an important  
14 element of TCM which combines the meridians and collateral theory, Yin-Yang theory  
15 and Five-element theory. The coordinated movement of Tai Chi postures, namely  
16 "Stirring up Dantian", "Yi-Qi Cooperation", "Spiral Silk Reeling" and "Qi Flowing to  
17 Four Tips (hair, tongue, teeth and bone)" can promote the channeling of Qi and blood  
18 to nourish the body, resist diseases and promotes immunity. Previous studies have  
19 shown that regular Tai Chi exercise is beneficial in improving psychological and  
20 physiological outcomes among CHD patients.[3,5,6] A meta-analysis showed that Tai  
21 Chi exercise improves left ventricular ejection fraction (LVEF), cardiac output, stroke  
22 output and reduces resting myocardial oxygen consumption in elderly patients. In  
23 addition, Tai Chi improves vascular elasticity and promotes the regulation of blood  
24 pressure, glucose and lipids.[7]

25  
26 However, there are many schools in Tai Chi such as the Yang-style, Wu-style, Chen-  
27 style, Wu-style and Sun-style, wherein each style takes a different approach in terms of  
28 the movements and forms. Furthermore, as Tai Chi exercise comprises many assorted  
29 movements that can be also complex to perform, it is difficult to popularize and simplify  
30 the exercise, especially in elderly patients and patients with chronic diseases.

31  
32 Based on prior insights of the Tai Chi movements obtained from our studies and  
33 other published work,[8,9] our research team developed an innovative TCCRP  
34 specifically for CHD patients. However, as the value of TCCRP has yet to be clinically  
35 proven, a clinical trial is required to validate the benefits of adopting this exercise for  
36 CHD patients.

This study aims to assess the efficacy, safety, and acceptability of TCCRP for CHD patients. The primary hypothesis is that TCCRP (the intervention group) will improve 36-Item Short Form Survey (SF-36), and reduce the score of Chinese Perceived Stress Scale (CPSS) when compared against conventional exercise rehabilitation (CER, the control group). Secondary objectives are to evaluate the effects of the TCCRP on body composition, cardiopulmonary exercise test, respiratory muscle function, locomotor skills, echocardiogram, NYHA classification, heart rate recovery time and laboratory examination. Other indicators measured will include SAQ, PSQI, PHQ-9, GAD-7, BBS, MFS, KCCQ and major adverse cardiac events. Additional objectives to be explored will include: (1) the influence of potential factors on the adherence to the TCCRP; (2) the safety of the TCCRP and (3) individual experiences and acceptability following the TCCRP.

## **Methods/Design**

### **Study design**

This is a prospective, multicenter, randomized-controlled clinical trial comparing a TCCRP with CER with an allocation ratio of 1:1. The study period lasts for 6 months including a 3-month supervised intervention and a 3-month follow-up with the primary outcomes measured at baseline, 1 month, 3 months and 6 months. Secondary outcomes will be measured at baseline and after a 3-month intervention period.

This study is registered on ClinicalTrial.gov (NCT03936504). A brief flowchart of the entire study is shown in Figure 1 and the schedule of events is provided in Table 1.

### **Participants**

#### **Inclusion criteria**

1. Male or non-pregnant women aged from 18 to 80 years;
2. Patients who met the criteria for stable angina pectoris in accordance with CHD classifications;
3. NYHA class I, II or III; and
4. Participants who understood the purpose of the clinical trial and voluntarily participate with signed informed consent.

## Exclusion criteria

1. Acute myocardial infarction (AMI) within 2 weeks;
2. Severe aortic stenosis;
3. Hypertrophic cardiomyopathy;
4. Severe valvular heart disease;
5. Malignant tachyarrhythmia;
6. Poor patient compliance and incompleteness of the clinical trial for not satisfying the requirements;
7. Patients with nervous system deterioration, motor system disease, or rheumatic disease caused by combined exercise;
8. Those who regularly practice Tai Chi during the previous 3 months.

## Setting and Recruitment

This multicenter study will be performed at the Beijing Normal University in China. Recruitment and exercise training will occur at the Chinese PLA General Hospital, China, Beijing Shuili Hospital, China, and Anzhen Community Health Service Center, Beijing Chaoyang District, China. One hundred and fifty participants are to be recruited and the recruitment is scheduled to begin in October 2019. Combinations of advertising strategies include flyers within the hospital, advertisements in the print, online media, a major messaging platform (WeChat), clinics and databases.

## Randomization, allocation concealment and blinding

After informed consent is signed, all patients will be randomized into either an intervention group receiving a 12-week TCCR or a control group receiving CER. The random allocation sequence will be produced by an independent statistician via the PLAN sentences of the statistical software SAS 9.2 in a 1:1 ratio. Next, these assignments will be sent to a study staff member, exclusive to the study coordinator or principal investigator, who will store them into sealed, opaque envelopes with date and signature labels placed over the seals of the envelopes. The randomization envelopes

will not be opened unless a participant meets eligibility criteria, completes the informed consent, and undergoes a baseline assessment. The study is conducted in 3 different cycles. Each cycle consists of a TCCRP group (intervention group) and CER group (control group). Each resulting group consists of 25 patients, equating to a 50 patients participating in each cycle, with a total of 150 patients over the course of the 3 cycles comprising the study. The instructors are randomly assigned to the 3 cycles.

Given the nature of the intervention, it is impossible to blind the patients or any personnel who are directly involved in conducting the programs. However, all outcome assessors, laboratory technicians, data managers and statisticians will be kept blind of the treatment allocations.

### **Patient and Public Involvement**

Involvement of patients and public help us to recognize whether we are doing the right thing. Moreover, our research is investigating the impact of different exercise types, while irrelevant to any drug or pharmacy corporations, so we can give priority to patients as far as possible. During the clinical work of cardiac rehabilitation (CR) exercise training, we always take a lot of time to communicate with patients to ask about their opinion about coronary artery disease, and about life style therapy and exercise training. The patients discussed many times with me whether we could practice the Chinese traditional Qigong, such as Baduanjin or TaiChi. Compared with generally accepted aerobic exercise, dose TaiChi exhibit better effect? There are few well designed clinical trials which could answer the question, so we chose this study to perform.

Since the very beginning of our study, we have constructed a Patient Public Involvement group, to let us know what are the things patients think to be most important and whether we have done the right study. We choose on purpose the CHD patients with different work and different income level. For example, we chose government officials, workers, cook, information technology programmer and teachers. We held several group meetings, to discuss with them what are the things troubling them most now, what do they think about exercise training and TaiChi, and what is the

1  
2  
3  
4 most effective aspect do they think TaiChi would work. We also ask them whether they  
5 worry about the safety of exercise, and which kind of exercise do they think is the safest.  
6  
7 Many patients told us they had heard TaiChi could improve the sleeping disorder and  
8 insomnia. After the discussion were held, we realized CHD patients care most about  
9 how much physical activity is limited, and how to reduce the incidence of angina  
10 pectoris. Besides, they are willing to try some Chinese traditional Qigong, such as  
11 Baduanjin or Taichi. So we designed our study to compare the impact of TaiChi and  
12 traditional exercise training among CHD population. Taken into consideration of what  
13 the patients care most, to take patients' priorities and preferences, we chose the  
14 improvement of cardiopulmonary capacity, score of 36-Item Short Form Survey (SF-  
15 36), sleep quality index and score indicating stress as outcomes.  
16  
17

18  
19 We have constructed a Patient Public Involvement group and held the group meeting  
20 periodically. We discussed with the patients to find out the most important aspect they  
21 care to be investigated. They also helped us recognize the valuable outcomes to be  
22 measured. We also contact with them during the conducting period of study to find the  
23 most effective and convenient way for patients. For the sake of patients, we also  
24 perform the study at the hospitals, a location familiar to participants.  
25  
26

27  
28 Patients were involved a lot in the recruitment to and conduct of the study. During  
29 the group meeting, Patient Public Involvement group members were informed about  
30 how the study will be conducted. We also discussed the issue about participant  
31 recruitment in detail. After the communication, the patients suggested us to prepare  
32 simple booklet to introduce our study during the outpatients visit and by internet, also  
33 to enlarge the recruitment extent by WeChat and app of our hospital through smart  
34 mobile phone. The possible difficulties in recruitment were also assessed by the  
35 research team and Patient Public Involvement group members together. The possible  
36 methods were also to be mined.  
37  
38

39  
40 The detailed training schedules were also discussed with the group members in order  
41 to determine the data and time convenient for the patients. Based on the suggestion by  
42 the patient and public involvement group members, we used ECG monitoring during  
43 the exercise training. During the study, the patient and public involvement group  
44  
45  
46  
47  
48  
49  
50  
51  
52  
53  
54  
55  
56  
57  
58  
59  
60

members were asked periodically if they felt comfortable and able to continue participating. During the study, Patient Public Involvement group members also feedback with us whether and when we should extend the rest time. Patient Public Involvement group members also helped us explain to the patients what our study is about and the detail of the study in the way patients can understand easier.

We planed to disseminate our research to the participants and the public, such as publicizing our research in hospital official accounts and various academic lectures. At the same time, we also recommend that patients in the group send study results to their respective friend WeChat groups and family WeChat groups to spread the results rapidly. We discussed the way to disseminate findings to study participants with Patient Public Involvement group. They suggested us share the results to all the participants face to face. By this way, the study researchers could explain the results more clearly and instruct them to choose the more effective exercise type.

They have been informed on detail, and it will be the patients themselves who decides whether to take part in or not. We also discussed the study protocol with Patient Public Involvement group members. Randomised trial means no one could decide which intervention will be delivered to a certain patient. Patient Public Involvement group suggested we can teach the participants in control group Tai Chi for free, later after they have finished the total study if they want. This will be more grateful for those who longs for be randomized to Taichi group. Patient advisers should also be thanked in the contributorship statement/acknowledgements. Finally, to measure the burden more clearly, we will also ask them to fill in a scale to tell more details about the burden of the intervention.

In the end, we have added the acknowledgements to Patient Public Involvement group members for their support for this study.

## **INTERVENTIONS**

### **Tai Chi cardiac rehabilitation program (TCCRP) group**

Patients in the intervention group will receive TCCRP conducted by a cardiac rehabilitation team consisting of cardiologists, cardiology nurses, Tai Chi coaches and



research assistants. Procedures and activities of the TCCRP include: (1) Tai Chi exercise, (2) evaluation of exercise ability, (3) education covering topics related to the exercise, and (4) a series of adherence strategies.

### **TCCRP pre-phase: a 2-week exercise before the start of exercise**

#### **1. TCCRP training**

Three professional coaches with at least 5 years of Tai Chi teaching experience will be employed to teach and guide the participants' training. TCCRP will include (a) traditional Tai Chi warm-up exercises, followed by (b) Bafa Wubu of Tai Chi, (c) Tai Chi elastic belt exercise and (d) Tai Chi cool-down exercises.

(a) Tai Chi warm-up exercises (10 minutes) will include traditional breathing methods (full-body breathing), weight shifting, arm-swinging etc. These exercises will help release tension in the physical body, incorporate mindfulness and imagery into movement, increase breathing awareness and promote overall relaxation of the body and mind.

(b) The core Tai Chi movements (30 minutes) will be adapted from the Bafa Wubu of Tai Chi (also known as "eight methods and five footwork", Fig. 2), which include introductory routines to Tai Chi characterized with simple structures and rich connotations performed repetitively. Technically speaking, the "Bafa" consists eight hand techniques, namely "Peng (warding off), Lu (rolling back), Ji (pressing), An (pushing), Cai (pulling down), Lie (splitting), Zhou (elbowing) and Kao (shouldering)"; while the "Wubu" consists five footwork, namely "Jin (advancement), Tui (retreat), Gu (shifting left), Pan (shifting right) and Ding (central equilibrium).

(c) Tai Chi combined with light-weight resistance band exercises (10 minutes) will include Tai Chi "Open and Close" movement, Tai Chi Spinning movement and Tai Chi Twining movement.

(d) Tai Chi cool-down exercises (10 minutes) will include various relaxation methods, such as regulating breathing, regulating Qi and regulating mindfulness (Yi). Patients are required to practice the TCCRP until they master it. Mastery will be determined by the professional coaches.

#### **2. Evaluation of exercise ability (week – 1 to week 0):**



- (a) Evaluation is conducted by cardiologists and physiotherapists;
  - (b) Evaluation is based on reviewing medical history, cardiopulmonary exercise test results and the performance of Tai Chi (heart rate and oxygen consumption will be recorded while performing Tai Chi);
  - (c) Evaluation results will guide the goal-setting process during consultation;
3. Education covering topics related to exercise:
- (a) Basic knowledge of chronic heart disease,
  - (b) Basic knowledge of exercise-based cardiac rehabilitation.

### **TCCRP exercise phase: a 12-week intervention period**

Participants will perform the TCCRP 3 times a week for 12 weeks. Each training session is 60 minutes and includes Tai Chi warm-up exercises (10 minutes), Bafa Wubu of Tai Chi (30 minutes), Tai Chi combined with light-weight resistance band exercises (10 minutes) and Tai Chi cool-down exercises (10 minutes). All participants will be encouraged to practice Tai Chi according to an instructional video until the end of the 12-week period.

Researchers will record the subjects' heart rate and blood pressure before and after training. During the training, the exercise intensity will be assessed by the Borg Rating of Perceived Exertion Scale (RPE Scale),<sup>[10]</sup> which is a frequently used quantitative measure of perceived exertion during exercise.

### **TCCRP follow-up phase: a 12-week follow-up period**

After the 12-week TCCRP intervention, there will be a 12-week follow-up period that excludes any active rehabilitation. During the follow-up period, the participants will be asked to fill out forms to record the times and durations of their Tai Chi exercise or other physical activities and any incidence of a major adverse cardiac event. The forms will be returned to the researchers for follow-up each week by email or WeChat.

### **CER group (Control group)**

Participants in the control group will receive a CER 3 times a week for 12 weeks. Each training session lasts for 60 minutes, including ordinary warm-up exercises (10 minutes), aerobic activity (30 minutes), resistive exercise (10 minutes) and cool-down exercises (10 minutes). Each training session includes: (1) an active warm-up including arm-swinging, gentle stretches of the neck, shoulders, spine, arms and legs; (2) an aerobic activity comprising primarily cycle ergometer exercise; (3) resistive exercise mainly including resistance band exercises; and (4) a cool-down session involving active and static stretching exercises with primary body movements.

The CER program is consistent with the current recommended guidelines of moderate intensity exercises (50 to 80% Heart Rate Reserve (HRR): Rated Perceived Exertion 11–13) for CHD patients. Our program is individually tailored to each participant alongside close supervision. The program will be introduced and increased in duration and intensity gradually to achieve the target of moderate-intensity exercise.

### **Concomitant treatment**

Participants in both groups will continue routine medications, such as aspirin, metoprolol, anti-platelet and anti-coagulant drugs or beta-adrenergic blockers, according to patients' respective conditions and will maintain their usual treatment visits throughout the study. All procedures and medication prescriptions will be determined by physicians following the clinical guidelines.[11,12] The specific date and reasons of any medical therapy changes will be recorded in the case report form (CRF).

### **Outcome measures**

All outcome measures will be collected by 3 research assistants at 2 weeks (baseline), 1 month, 3 months (at the end of intervention) and 6 months (at the 3-month follow-up). Demographic information collected will include age, gender, ethnicity, marital status, education level, accommodation type and postal address. Clinical information will also be obtained from the patients' clinical records by a member of their hospital research team. All data collected from the assistants and therapists will be stored in a

dedicated computer for the study and will be kept in a secure and lock-protected location.

### Primary outcome measures

1. The SF-36 Health Survey (SF-36) is a multi-purpose, short-form health survey with only 36 questions.[13] SF-36 items cover eight domains: physical functioning, role limitations due to physical health problems, body pain, general health, vitality, social functioning, role limitations due to emotional problems and mental health. Higher scores indicate higher levels of health. SF-36 will be evaluated at baseline, 1 month, 3 months (at the end of intervention) and 6 months (at the 3-month follow-up).
2. Chinese Perceived Stress Scale (CPSS) is a self-rated questionnaire that assesses perceived stress.[14] CPSS consists 14 items that are divided into two categories: sense of tension and loss of control. Higher scores indicate higher levels of stress. CPSS will be evaluated at baseline, 1 month, 3 months (at the end of intervention) and 6 months (at the 3-month follow-up).

### Secondary outcome measures

1. Body composition measurements will include fat mass, body fat (percentage), fat-free mass and lean body mass. These measurements will be taken by bioelectrical impedance analysis using an Inbody 770 (Biospace Co) at baseline, 1 month, 3 months (at the end of intervention) and 6 months (at the 3-month follow-up).
2. Cardiopulmonary exercise test (CPET) is an objective method being increasingly used in a wide spectrum of clinical practice for assessing the functional capacity of CHD patients. Indexes include changes in  $VO_2$  peak and VAT and  $VE/VCO_2$  slope in the cardiopulmonary exercise test (CPET) at the end of the 3-month intervention.
3. Respiratory muscle function will be measured by POWER breath K-5. Indexes include changes in S-Index, Peak PIF of inspiratory velocity and power at the end of the 3-month intervention.
4. Locomotor skills includes handgrip strength, balance and flexibility. Handgrip

strength, which is used to determine the maximum isometric strength of the hand and forearm muscles, will be measured using the handgrip strength dynamometer produced by CAMRY (product type EH101). The best result from repeated tests of each hand will be recorded. The balance test mainly includes standing on one foot with eyes closed, standing on one foot with eyes open, standing in situ with closed eyes and so on. Flexibility will be measured by seated forward flexion test. Locomotor skills will be evaluated at baseline and at the end of the 3-month intervention.

5. An echocardiogram comprising LVED Vi and LVEF using echocardiography will be assessed at baseline and at the end of the 3-month intervention. NYHA classification will also be evaluated at baseline and at the end of the 3-month intervention.
6. Heart rate recovery time will be measured. Heart rate recovery time will record heart rate 1 to 6 minutes after Tai Chi exercise, power cycling and resistance exercise.
7. A laboratory examination will be performed that includes glycolipid metabolism, inflammatory factor level, immunologic function and oxidative stress index. The laboratory examination will be evaluated at baseline and at the end of the 3-month intervention.
8. The Berg Balance Scale (BBS) is a widely used clinical test of a person's static and dynamic balance abilities,[15] and comprises of a set of 14 simple balance related tasks, ranging from standing up from a sitting position to standing on one foot. Total score ranges from 0 to 56, with 0 to 20 corresponding to a high fall risk, 21 to 40 a medium fall risk and 41 to 56 a low fall risk. The Berg Balance Scale will be evaluated at baseline and at the end of the 3-month intervention.
9. The Pittsburgh Sleep Quality Index (PSQI) is a self-rated questionnaire that assesses sleep quality and disturbances.[16] It contains 19 self-answered questions for the subject and 5 peer-answered questions for the bed partner or a roommate (if one is available). The scores from seven categories are added to calculate the index, ranging from 0 to 21. A score of zero indicates no disturbance in sleep or good

sleep quality, whereas higher scores indicate poorer sleep quality. The PSQI will be evaluated at baseline and at the end of the 3-month intervention.

10. Patient Health Questionnaire-9 (PHQ-9) and Generalized Anxiety Disorder-7(GAD-7) are validated self-answered questionnaires that assess levels of depression and anxiety. Higher scores reflect greater levels of anxiety and depression. PHQ-9 and GAD-7 will be evaluated at baseline and at the end of the 3-month intervention.
11. The Seattle Angina Score (SAQ) will be used to determine the total number of 9 problems and the 5 aspects of CAD, including the degree of physical activity, the stability and frequency of angina, the degree of satisfaction of the treatment, and the perception of the disease. The higher the score, the better the quality of life and body function. SAQ will be measured at baseline and at the end of the 3-month intervention.
12. A record will be made of any side effects and possible adverse reactions arising from the intervention.

### **Safety measurements**

All study participants are monitored weekly during the study intervention for the occurrence of adverse events defined by any undesirable experience. All adverse events that occur during the study will be recorded on the Adverse Event Case Report Form and will be evaluated for relevance to the intervention. All adverse events will also be reported to the Human Research Committee promptly in accordance with guidelines.

Only patients who are eligible and capable of completing the test will undergo a Cardiopulmonary Exercise Test (CPET). For enrolled patients meeting the rehabilitation training standards, they will be stratified according to the degree of motion risk and appropriate exercise intensity and time will be adjusted based on their risk stratification. Before the cardiac rehabilitation exercise, researchers will educate patients about the CHD rehabilitation exercises, including training contraindications and exercise advisories regarding the respective CER and TCCRP exercises. Moreover, the cardiac rehabilitation Center of Chinese PLA General Hospital, Beijing Shuili

Hospital and Anzhen Community Health Service Center are equipped with a comprehensive set of rescue equipment. A thorough contingency plan and rescue procedure for cardiovascular events has also been formulated prior to the commencement of the research. Should an adverse event occur during the exercise, the researchers will immediately initiate the contingency plan to circumvent the occurrence of any fatal outcomes.

### **Data management and monitoring**

Beijing Normal University will be responsible for monitoring research progress, managing the data and performing statistical analyses. The research assistants will be responsible for checking the integrity of the completed CRF and for timely entry of the collected data into the EpiData Manager, a free data management software. The project manager will be responsible for initial data cleaning, identifying, coding and converting the data into the proper format for analysis. All investigators involved in data management and analysis will be blinded to treatment allocation.

### **Statistical analysis**

Continuous variables will be presented as the mean  $\pm$  standard deviation (SD). Median or interquartile range (IQR) and categorical variables will be presented as frequencies or percentages. Baseline data between the two groups will be compared and assessed using a two-sample Student's t-test for continuous variables and the chi-square test or Wilcoxon test for categorical variables. Questionnaire score data, also known as non-normally distributed data, will be transformed and analyzed with a nonparametric test. We will conduct an intention-to-treat analysis if participants are lost or dropout from the study prior to the follow-up. All data will be analyzed with SPSS 21.0 (IBM, Chicago, IL, USA) software packages and Microsoft Excel 2007. Statistical significance is defined as a two-sided  $P$  value  $< 0.05$ .

### **Adherence**

During the 3-month treatment period, participants will be asked to practice strictly

according to the training program and will not be allowed to take part in any new or additional exercise programs. Throughout the 3-month intervention period, the researchers will track the number of missed sessions for each participant during the intervention period. Participants' attendance will be monitored during each in-person session by staff-completed attendance forms and class sign-in sheets. The percentage of compliance will be documented on the case report form. The rate of patient compliance = (total planned number of times – number of absence) / total number of times × 100%. A compliance rate of 80% or greater will be considered as good, whereas a compliance rate of less than 80% is considered as poor. An attendance of less than 20% will be considered as a dropout from the study.

## Discussion

The development of an ideal and effective cardiac rehabilitation program is still being explored and current cardiac rehabilitation mainly consists of contemporary cardio exercises. In fact, current cardiac rehabilitation programs have been reported to be underdeveloped and limited, reflected by a poor level of involvement with less than 30% of patients participating in the existing offerings.[17] As such, there is an unmet need for reforms and the provision of alternative cardiac rehabilitation programs to encourage the growth of cardiac rehabilitation. The exploration of an ideal cardiac rehabilitation exercise that is most beneficial for CHD patients should be determined by its complementary effects to the efficacy of existing treatments.

This trial will be the first to compare the feasibility, safety and benefits of TCCRP and CER in CHD patients. Compared with conventional exercise styles (e.g. aerobic, resistance, and extensibility exercise), Tai Chi typically involves a mind–body integration practice that balances the Yin and Yang in the body, promotes blood circulation and Qi for maximizing both physical and mental well-being.[18-20] Previous studies have shown that regular Tai Chi exercise is beneficial in improving psychological and physiological outcomes among the elderly and various clinical populations (e.g. Parkinson's disease, diabetes mellitus, hypertension, chronic obstructive pulmonary disease (COPD) and psychological illness).[21-24] As a typical



mind–body exercise which incorporates the characteristics of Traditional Chinese Medicine, Tai Chi may be considered to be an effective exercise to promote health in a diverse range of populations (e.g. healthy population, patients with chronic diseases, youths, middle-aged or elderly adults) [7,25,26,].

At present, many Tai Chi intervention programs differ diversely in terms of their duration, style and movements. In fact, some Tai Chi styles and movements can be too complex or difficult for older people to learn; and thus, not all Tai Chi styles and movements are suitable for patients with CHD. Hence, our research team developed a simple and gentle TCCRCP that is especially suitable for patients with CHD, whose activity tolerance is poor.

An earlier study reported that over 60% of CHD patients would decline the regular cardiac rehabilitation exercise if they perceived the physical exercise to be unpleasant, painful or impossible to perform in view of their conditions.[3] In that study, CHD patients who declined the regular cardiac rehabilitation, underwent a Tai Chi exercise program and were found to be very receptive of the Tai Chi exercise (66% compliance rate). In fact, all patients who experienced the Tai Chi rehabilitation program shared that they will recommend it to a friend, thereby suggesting a high level of acceptance of Tai Chi as a cardiac rehabilitation exercise for patients. Corresponding to the objectives of the current proposed study, the previous study by Salmorirago-Blothcer et al. concluded that it is imperative to validate the benefits of Tai Chi in a larger cohort of CHD patients in order to develop Tai Chi as an ideal alternative cardiac rehabilitation exercise.[3]

There are several strengths of our trial: 1) the proposed research study is unique in that the TCCRCP is specifically designed for patients with CHD; 2) Tai Chi exercise can be easily performed and mastered at home and is relatively gentle for CHD patients to practice thereby encouraging patient compliance. Moreover, if the TCCRCP is proved to be effective, TCCRCP can be a high compliance and cost-free rehabilitation program that patients can do at home. This will help save time and costs for CHD patients requiring cardiac rehabilitation while potentially reducing social medical expenditure.

It should be acknowledged that this study has several limitations. It is difficult to



monitor any additional physical activity of participants during the study duration. Although all participants will be required to record their daily physical activity or exercise information with a pedometer, this is not sufficiently accurate to track their daily activity intensity. Furthermore, due to the nature of the exercise interventions (Tai Chi versus CER), the blinding of participants is unachievable in this trial. However, every effort will be made to ensure that the outcome assessors, data managers and statisticians participating in this study will be kept blind of the treatment allocations.

In conclusion, this study aims to develop an effective TCCRP for CHD patients and to explore the safety and effectiveness of TCCRP intervention in CHD patients. The results obtained from this trial will be vital to help establish an optimal cardiac rehabilitation program for treating CHD patients and will provide reliable evidence for the potential application of TCCRP in cardiac rehabilitation. Lastly, the findings from this study will also provide relevant understanding for developing a Chinese Tai Chi rehabilitation guide to complement existing CHD therapies.

### **Trial status**

This trial began to recruit patients from October 2019. Estimated completion of the trial is expected to be completed by December 2020.

### **Additional files**

### **Abbreviations**

CHD: coronary heart disease; TCCRP: Tai Chi cardiac rehabilitation program; TCM: Traditional Chinese Medicine; CER: conventional exercise rehabilitation.

### **Author affiliations**

<sup>1</sup>College of Physical Education and Sports, Beijing Normal University, Beijing, China

<sup>2</sup> Department of Cardiovascular Medicine, Military General Hospital of Beijing PLA, Beijing, China

<sup>3</sup> Anzhen Community Health Service Center, Chaoyang District, Beijing, China

<sup>4</sup> Department of Cardiovascular Medicine, Beijing Shuili Hospital, Beijing, China

<sup>5</sup> College of Wushu, Beijing Sports University, Beijing, China

### **Authors' contributions**

MJ, LSJ and YHC conceived and designed the study protocol. The individual interviews were conducted by MJ, LH, ZLS, and GAY. MJ and ZJW performed the translation and analysed the data. ZJW, YW, CZH, WQY, CMZ, LYM, LYL, GTM, LCH, SB and WHW guided and supervised the Tai Chi training. MJ and ZJW contributed to writing and reading the manuscript. All authors approved the final manuscript.

### **Acknowledgements**

The authors most gratefully thank the physicians and nurses of the Chinese PLA General Hospital, Beijing Shuili Hospital and Anzhen Community Health Service Center, Chaoyang District, Beijing. Thank you for effort working as numbers of Patient Public Involvement group, such as Weiling Guo, Wu Feng, Haibin Wang, Yong Ma and Jijun Li.

### **Funding**

This work is financially supported by National Key R&D Program of China(2018YFC2000600) and Finance Department of the State Administration of Traditional Chinese Medicine (GZY-GCS-2018-011) and the Wushu Research Institute of the General Administration of Sport of China (WSH2018A004).

### **Competing interests**

The authors declare that they have no competing interests.

### **Provenance and peer review**

Not commissioned; externally peer reviewed.

## Data sharing statement

The results of the review will be disseminated through peer-reviewed publications.

## Open Access

This is an open access article distributed in accordance with the Creative Commons Attribution Non Commercial (CC BY-NC 4.0) license, which permits others to distribute, remix, adapt, build upon this work non-commercially, and license their derivative works on different terms, provided the original work is properly cited and the use is non-commercial. See: <http://creativecommons.org/licenses/by-nc/4.0/>

© Article author(s) (or their employer(s) unless otherwise stated in the text of the article) 2019. All rights reserved. No commercial use is permitted unless otherwise expressly granted.

## References

1. Lozano R, Naghavi M, Foreman K, et al., Global and regional mortality from 235 causes of death for 20 age groups in 1990 and 2010: a systematic analysis for the Global Burden of Disease Study 2010. *Lancet* 2012;380:2095-128.
2. Mirzaei M, Truswell AS, Taylor R, Leeder SR. Coronary heart disease epidemics: not all the same. *Heart* 2009;95:740-6.
3. Salmoirago-Blotcher E, Wayne PM, Dunsiger S, et al. Tai Chi Is a Promising Exercise Option for Patients With Coronary Heart Disease Declining Cardiac Rehabilitation. *J Am Heart Assoc* 2017;6(10).
4. Tao T, He T, Wang X, Liu X. Metabolic Profiling Analysis of Patients With Coronary Heart Disease Undergoing Xuefu Zhuyu Decoction Treatment. *Front Pharmacol* 2019;10:985.
5. Taylor-Piliae RE, Silva E, Sheremeta SP. Tai Chi as an adjunct physical activity for adults aged 45 years and older enrolled in phase III cardiac rehabilitation. *Eur J Cardiovasc Nurs* 2012;11:34-43.
6. Sato S, Makita S, Uchida R, Ishihara S, Masuda M. Effect of Tai Chi training on baroreflex sensitivity and heart rate variability in patients with coronary heart disease. *Int Heart J* 2010;51:238-41.
7. Liu T, Chan A W, Liu Y H, Taylor-Piliae RE. Effects of Tai Chi-based cardiac rehabilitation on aerobic endurance, psychosocial well-being and cardiovascular risk reduction among patients with coronary heart disease: A systematic review and meta-analysis. *Eur J Cardiovasc Nurs* 2018;17:368-83.
8. Jianwei Zhang, Shaojun Lyu, Ji Wang, et al. A comparative study on the therapeutic effect of Taijiquan on patients with type 2 diabetes mellitus of different

- genders [J]. *J Beijing normal University (Nat Sci Ed)* 2019;55:545-50 Chinese.
9. Shaojun Lyu. *Bafa Wubu of Tai Chi*. Beijing: Beijing Sport University Press. 2018.
  10. Borg GA. Psychophysical bases of perceived exertion. *Med Sci Sports Exerc* 1982;14:377-81
  11. Fletcher GF, Ades PA, Kligfield P, et al. Exercise standards for testing and training: a scientific statement from the American Heart Association. *Circulation* 2013;128:873-934.
  12. Piepoli MF, Conraads V, Corrà U, et al. Exercise training in heart failure: from theory to practice. A consensus document of the Heart Failure Association and the European Association for Cardiovascular Prevention and Rehabilitation. *Eur J Heart Fail* 2011;13:347-57.
  13. Ware JE Jr, Gandek B. Overview of the SF-36 Health Survey and the International Quality of Life Assessment (IQOLA) Project. *J Clin Epidemiol* 1998;51:903-12.
  14. Yang T. Psychological stress of urban population in social transition. *Chin J Epidemiol* 2002;(6):64-6 Chinese.
  15. Berg K, Wood-Dauphinee S, Williams JI: The balance scale: reliability assessment for elderly residents and patients with an acute stroke. *Scand J Rehab Med* 1995;27:27-36.
  16. Buysse DJ, Reynolds III CF, Monk TH, Berman SR, Kupfer DJ. The Pittsburgh Sleep Quality Index: a new instrument for psychiatric practice and research. *Psychiatry Res* 1989;28:193-213.
  17. Gruyter E D, Ford G and Stavreski B. Economic and Social Impact of Increasing Uptake of Cardiac Rehabilitation Services – A Cost Benefit Analysis. *Heart Lung Circ* 2016;25:175-83.
  18. Nery RM, Zanini M, Ferrari JN, et al., Tai Chi Chuan for cardiac rehabilitation in patients with coronary arterial disease. *Arq Bras Cardiol* 2014;102:588-92.
  19. Yang YL, Wang YH, Wang, SR, Shi PS, Wang C. The Effect of Tai Chi on Cardiorespiratory Fitness for Coronary Disease Rehabilitation: A Systematic Review and Meta-Analysis. *Front Physiol* 2018;8:1091.
  20. Lan C, Chen SY, Lai JS, Wong MK. The effect of Tai Chi on cardiorespiratory function in patients with coronary artery bypass surgery. *Med Sci Sports Exerc* 1999;31:634-8.
  21. Chang RY, Koo M, Yu ZR, et al. The effect of Tai Chi exercise on autonomic nervous function of patients with coronary artery disease. *J Altern Complement Med* 2008;14:1107-13.
  22. Gao Q, Leung A, Yang Y, et al. Effects of Tai Chi on balance and fall prevention in Parkinson's disease: a randomized controlled trial. *Clin Rehabil* 2014;28:748-53.
  23. Xiao CM, Zhuang YC. Effects of Tai Chi ball on balance and physical function in older adults with type 2 diabetes mellitus. *J Am Geriatr Soc* 2015;63):176-7.
  24. Chan AW, Lee A, Lee DT, et al. The sustaining effects of Tai chi Qigong on physiological health for COPD patients: a randomized controlled trial. *Complement Ther Med* 2013;21:585-94.
  25. Chen WW, Sun WY. Tai chi chuan, an alternative form of exercise for health

1  
2  
3 promotion and disease prevention for older adults in the community. *Int Q*  
4 *Community Health Educ* 1996;16:333-9.

- 5  
6 26. Guo JB, Chen BL, Lu YM, et al. Tai Chi for improving cardiopulmonary function  
7 and quality of life in patients with chronic obstructive pulmonary disease: a  
8 systematic review and meta-analysis. *Clin Rehabil* 2016;30:750-64.  
9

10  
11  
12  
13  
14  
15  
16  
17  
18  
19  
20  
21  
22  
23  
24  
25  
26  
27  
28  
29  
30  
31  
32  
33  
34  
35  
36  
37  
38  
39  
40  
41  
42  
43  
44  
45  
46  
47  
48  
49  
50  
51  
52  
53  
54  
55  
56  
57  
58  
59  
60

For peer review only

**Table 1:** Schedule for data collection; outcome measures per visits

| Items                           | Phase I:<br>Screening | Phase II:<br>Baseline | Phase III:<br>Month 1 | Phase IV:<br>Month 3 | Phase<br>V:<br>Month 6 |
|---------------------------------|-----------------------|-----------------------|-----------------------|----------------------|------------------------|
| Inclusion/exclusion criteria    | √                     |                       |                       |                      |                        |
| Diagnostic index                | √                     |                       |                       |                      |                        |
| Signed informed consent         | √                     |                       |                       |                      |                        |
| Randomization and allocation    | √                     |                       |                       |                      |                        |
| Safety index                    | √                     | √                     | √                     | √                    |                        |
| General clinical information    |                       | √                     |                       | √                    |                        |
| Primary outcomes                |                       | √                     |                       | √                    |                        |
| Secondary outcomes              |                       | √                     |                       | √                    |                        |
| Other indicators                |                       | √                     |                       | √                    |                        |
| Recurrent cardiovascular events |                       |                       | √                     | √                    | √                      |
| Adherence                       |                       |                       | √                     | √                    | √                      |
| Adverse events                  |                       |                       | √                     | √                    |                        |
| Summary at the end of the study |                       |                       |                       |                      | √                      |

i

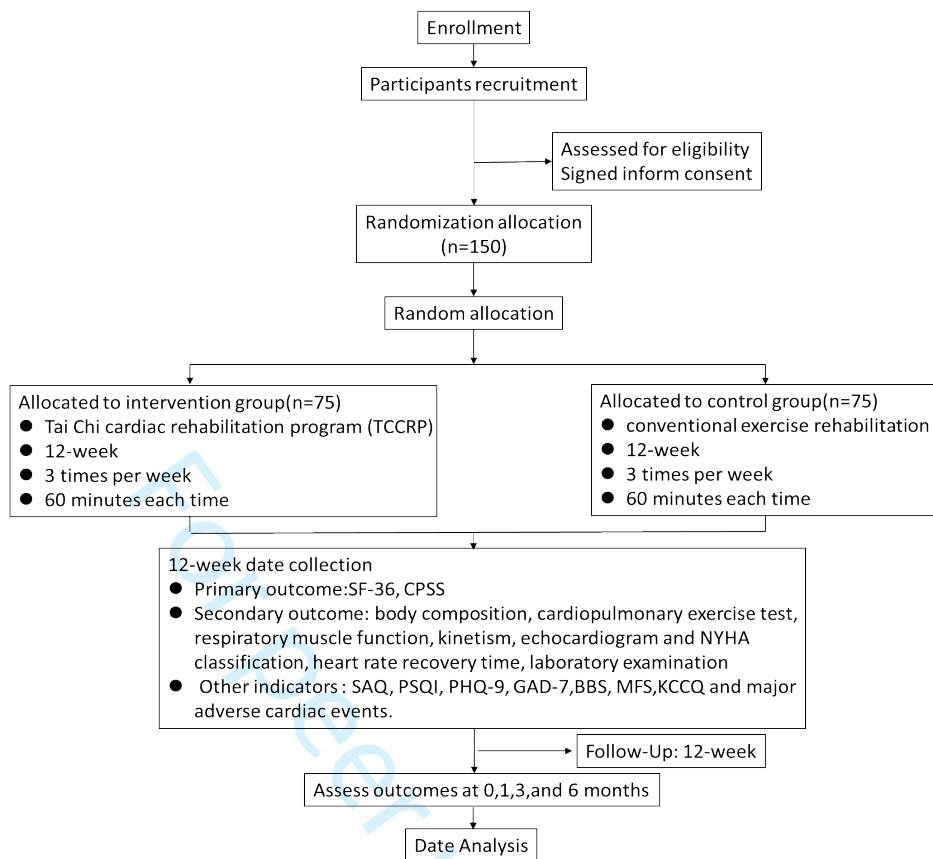

Figure 1: Flow diagram of study design

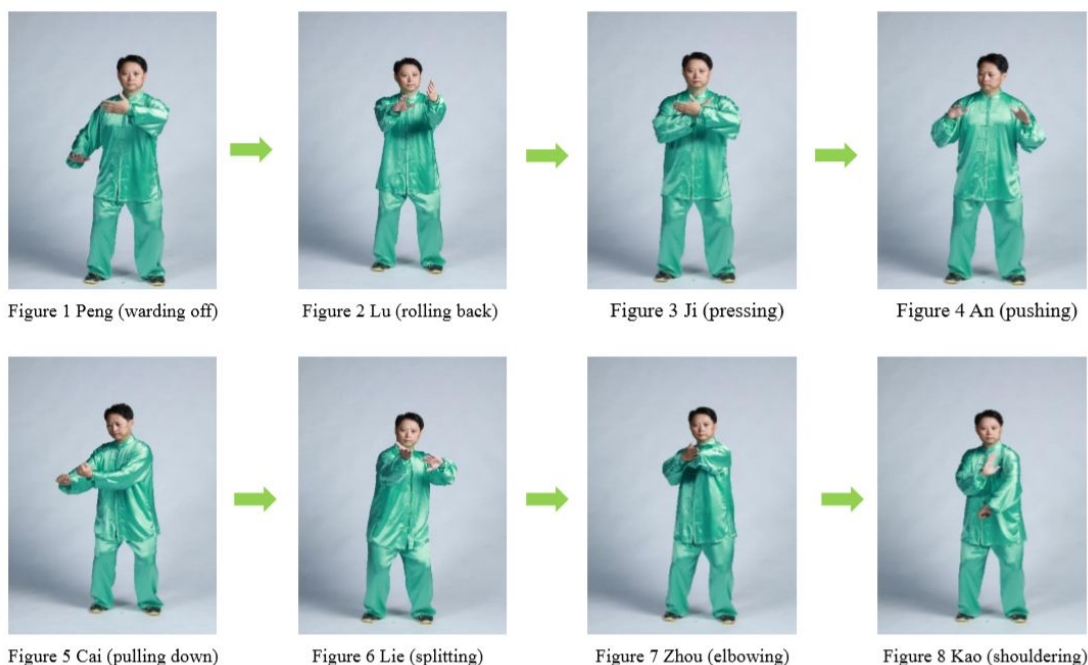

Figure. 2: Exemplary Bafa Wubu of Tai Chi; the pictures have taken the portrait right; the fuleman is the developer of TCCRP.

# BMJ Open

## Safety and Effectiveness of a TaiChi-based Cardiac Rehabilitation Program for Chronic Coronary Syndrome Patients: Study Protocol for a Randomized Controlled Trial

|                                 |                                                                                                                                                                                                                                                                                                                                                                                                                                                                                                                                                                                                                                                                                                                                                                                                                                                                                                                                                                                                                                                                                                                                                                                                                                                                                                                                                                                                                                                            |
|---------------------------------|------------------------------------------------------------------------------------------------------------------------------------------------------------------------------------------------------------------------------------------------------------------------------------------------------------------------------------------------------------------------------------------------------------------------------------------------------------------------------------------------------------------------------------------------------------------------------------------------------------------------------------------------------------------------------------------------------------------------------------------------------------------------------------------------------------------------------------------------------------------------------------------------------------------------------------------------------------------------------------------------------------------------------------------------------------------------------------------------------------------------------------------------------------------------------------------------------------------------------------------------------------------------------------------------------------------------------------------------------------------------------------------------------------------------------------------------------------|
| Journal:                        | <i>BMJ Open</i>                                                                                                                                                                                                                                                                                                                                                                                                                                                                                                                                                                                                                                                                                                                                                                                                                                                                                                                                                                                                                                                                                                                                                                                                                                                                                                                                                                                                                                            |
| Manuscript ID                   | bmjopen-2019-036061.R1                                                                                                                                                                                                                                                                                                                                                                                                                                                                                                                                                                                                                                                                                                                                                                                                                                                                                                                                                                                                                                                                                                                                                                                                                                                                                                                                                                                                                                     |
| Article Type:                   | Protocol                                                                                                                                                                                                                                                                                                                                                                                                                                                                                                                                                                                                                                                                                                                                                                                                                                                                                                                                                                                                                                                                                                                                                                                                                                                                                                                                                                                                                                                   |
| Date Submitted by the Author:   | 19-Feb-2020                                                                                                                                                                                                                                                                                                                                                                                                                                                                                                                                                                                                                                                                                                                                                                                                                                                                                                                                                                                                                                                                                                                                                                                                                                                                                                                                                                                                                                                |
| Complete List of Authors:       | <p>Ma, Jing; Military General Hospital of Beijing PLA, Department of Cardiovascular Medicine</p> <p>Zhang, Jian; Beijing Normal University, college of P.E and sports</p> <p>Li, Hua; Anzhen Community Health Service Center, Chaoyang District, Department of Cardiovascular Medicine</p> <p>Zhao, Lian; Beijing Shuili Hospital, Department of Cardiovascular Medicine</p> <p>Guo, Ai; Anzhen Community Health Service Center, Chaoyang District, Department of Cardiovascular Medicine</p> <p>Chen, Zai; Beijing Sport University, College of Wushu</p> <p>Yuan, Wen; Beijing Sport University, College of Wushu</p> <p>Gao, Tian; Beijing Normal University, College of Physical Education and Sports</p> <p>Li, Ya; Beijing Normal University, College of Physical Education and Sports</p> <p>Li, Cui; Beijing Sport University, College of Wushu</p> <p>Wang, Hong; Beijing Normal University, College of Physical Education and Sports</p> <p>Song, Bo; Beijing Normal University, College of Physical Education and Sports</p> <p>Lu, Yu; Beijing Normal University; Longyan University</p> <p>Cui, Mei; Beijing Normal University, College of Physical Education and Sports</p> <p>Wei, Qiu; Beijing Normal University, College of Physical Education and Sports</p> <p>Lyu, Shao; Beijing Normal University, College of Physical Education and Sports</p> <p>Yin, Heng; Beijing Normal University, College of Physical Education and Sports</p> |
| <b>Primary Subject Heading</b>: | Sports and exercise medicine                                                                                                                                                                                                                                                                                                                                                                                                                                                                                                                                                                                                                                                                                                                                                                                                                                                                                                                                                                                                                                                                                                                                                                                                                                                                                                                                                                                                                               |
| Secondary Subject Heading:      | Complementary medicine, Cardiovascular medicine, General practice / Family practice, Rehabilitation medicine, Evidence based practice                                                                                                                                                                                                                                                                                                                                                                                                                                                                                                                                                                                                                                                                                                                                                                                                                                                                                                                                                                                                                                                                                                                                                                                                                                                                                                                      |
| Keywords:                       | Coronary heart disease < CARDIOLOGY, SPORTS MEDICINE, COMPLEMENTARY MEDICINE, EDUCATION & TRAINING (see Medical Education & Training), REHABILITATION MEDICINE, Clinical trials < THERAPEUTICS                                                                                                                                                                                                                                                                                                                                                                                                                                                                                                                                                                                                                                                                                                                                                                                                                                                                                                                                                                                                                                                                                                                                                                                                                                                             |



1  
2  
3  
4  
5  
6  
7  
8  
9  
10  
11  
12  
13  
14  
15  
16  
17  
18  
19  
20  
21  
22  
23  
24  
25  
26  
27  
28  
29  
30  
31  
32  
33  
34  
35  
36  
37  
38  
39  
40  
41  
42  
43  
44  
45  
46  
47  
48  
49  
50  
51  
52  
53  
54  
55  
56  
57  
58  
59  
60

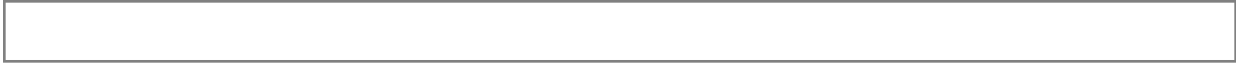

SCHOLARONE™  
Manuscripts

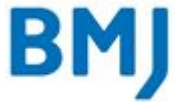

I, the Submitting Author has the right to grant and does grant on behalf of all authors of the Work (as defined in the below author licence), an exclusive licence and/or a non-exclusive licence for contributions from authors who are: i) UK Crown employees; ii) where BMJ has agreed a CC-BY licence shall apply, and/or iii) in accordance with the terms applicable for US Federal Government officers or employees acting as part of their official duties; on a worldwide, perpetual, irrevocable, royalty-free basis to BMJ Publishing Group Ltd ("BMJ") its licensees and where the relevant Journal is co-owned by BMJ to the co-owners of the Journal, to publish the Work in this journal and any other BMJ products and to exploit all rights, as set out in our [licence](#).

The Submitting Author accepts and understands that any supply made under these terms is made by BMJ to the Submitting Author unless you are acting as an employee on behalf of your employer or a postgraduate student of an affiliated institution which is paying any applicable article publishing charge ("APC") for Open Access articles. Where the Submitting Author wishes to make the Work available on an Open Access basis (and intends to pay the relevant APC), the terms of reuse of such Open Access shall be governed by a Creative Commons licence – details of these licences and which [Creative Commons](#) licence will apply to this Work are set out in our licence referred to above.

Other than as permitted in any relevant BMJ Author's Self Archiving Policies, I confirm this Work has not been accepted for publication elsewhere, is not being considered for publication elsewhere and does not duplicate material already published. I confirm all authors consent to publication of this Work and authorise the granting of this licence.

**ID :** 2019-036061

**Journal :** 《BMJ Open》

**(1) Article Title:**

Safety and Effectiveness of a TaiChi-based Cardiac Rehabilitation Program for Chronic Coronary Syndrom Patients: Study Protocol for a Randomized Controlled Trial

**(2) First-Author**

Jing Ma , Dr

Department of Cardiology

First Medical Center of Chinese People's Liberation Army General Hospital,

No. 28, Fuxing road, Haidian district, Beijing

Zip code: 100853 E-mail: [crystalma@126.com](mailto:crystalma@126.com)

**Co- First-Author**

Jianwei Zhang , PhD

Beijing Normal University

College of Physical Education and Sports

No.19 Xijiekou wai street Haidian district, Beijing

The People's Republic of China

Zip Code: 100875

E-mail: [13161615533@163.com](mailto:13161615533@163.com)

**(3) Co-authors**

Hua Li

Anzhen Community Health Service Center, Chaoyang District , Beijing , China

E-mail: [splawyer88@sina.com](mailto:splawyer88@sina.com)

Lianshan Zhao

Beijing Shuili Hospital, Beijing , China

E-mail: [zhaols1006@sina.com](mailto:zhaols1006@sina.com)

Aiying Guo

Anzhen Community Health Service Center, Chaoyang District , Beijing , China

E-mail: [229127866@qq.com](mailto:229127866@qq.com)

Zaihao Chen

---

1  
2  
3 College of Wushu, Beijing Sports University, Beijing, 100084, China.  
4 E-mail: [2455374274@qq.com](mailto:2455374274@qq.com)  
5  
6

7 Wen Yuan  
8 College of Wushu, Beijing Sports University, Beijing, 100084, China.  
9 E-mail: [2788127942@qq.com](mailto:2788127942@qq.com)  
10  
11

12 Tianming Gao  
13 College of P.E. and Sports, Beijing Normal University, Beijing, 100875, China. E-  
14 mail: [1714130371@qq.com](mailto:1714130371@qq.com)  
15  
16

17 Yameng Li  
18 College of P.E. and Sports, Beijing Normal University, Beijing, 100875, China. E-mail:  
19 [1439702398@qq.com](mailto:1439702398@qq.com)  
20  
21

22 Cuihan Li , Dr  
23 College of Wushu, Beijing Sports University, Beijing, 100084, China.  
24 E-mail: [569630979@qq.com](mailto:569630979@qq.com)  
25  
26

27 Hongwei Wang  
28 College of P.E. and Sports, Beijing Normal University, Beijing, 100875, China. E-mail:  
29 [13919437131@163.com](mailto:13919437131@163.com)  
30  
31

32 Bo Song  
33 College of P.E. and Sports, Beijing Normal University, Beijing, 100875, China. E-mail:  
34 [645353652@qq.com](mailto:645353652@qq.com)  
35  
36

37 Yulong Lu  
38 College of P.E. and Sports, Beijing Normal University, Beijing, 100875, China. E-mail:  
39 [34910476@qq.com](mailto:34910476@qq.com)  
40  
41

42 Meize Cui  
43 College of P.E. and Sports, Beijing Normal University, Beijing, 100875, China. E-mail:  
44 [2217554936@qq.com](mailto:2217554936@qq.com)  
45  
46

47 Qiuyang Wei  
48 College of P.E. and Sports, Beijing Normal University, Beijing, 100875, China. E-mail:  
49 [291610192@qq.com](mailto:291610192@qq.com)  
50  
51

#### 52 **(4) Corresponding author**

53  
54 Shaojun Lyu, Ph D  
55 Beijing Normal University  
56 College of Physical Education and Sports  
57 No.19 Xijiekou wai street Haidian district, Beijing  
58  
59  
60

---

The People's Republic of China  
Zip Code: 100875  
E-mail: [113121860699@163.com](mailto:113121860699@163.com)

Tel : +86 13121860699

### **Co -Corresponding author**

Hengchan Yin prof  
Beijing Normal University  
College of Physical Education and Sports  
No.19 Xijiekou wai street Haidian district, Beijing  
The People's Republic of China  
Zip Code: 100875  
E-mail: [yinhengchan@bnu.edu.cn](mailto:yinhengchan@bnu.edu.cn)

### **(5) Keywords**

Coronary heart disease; Complementary medicine; Healthcare; Cardiac rehabilitation;  
Clinical trials

**(6) Word count:** 4762 words

---

## Safety and Effectiveness of a TaiChi-based Cardiac Rehabilitation Program for Chronic Coronary Syndrom Patients: Study Protocol for a Randomized Controlled Trial

### ABSTRACT

**Introduction:** Preliminary evidence from clinical observations suggests that Tai Chi exercise may offer potential benefits for patients with chronic coronary syndrom(CCS). However, the advantages for CCS patients to practice Tai Chi exercise as rehabilitation have not been rigorously tested and there is a lack of consensus on its benefits. This study aims to develop an innovative Tai Chi Cardiac Rehabilitation Program (TCCRP) for CCS patients and to assess the efficacy, safety and acceptability of the program.

**Methods and analysis:** We propose to conduct a multicenter randomized-controlled clinical trial comprising of 150 participants with CCS. The patients will be randomly assigned in a 1:1 ratio into two groups. The intervention group will participate in a supervised TCCRP held 3 times a week for 3 months. The control group will receive supervised conventional exercise rehabilitation (CER) held 3 times a week for 3 months. The primary and secondary outcomes will be assessed at baseline, 1 month, 3 months after intervention and after an additional 3 months follow-up period. Primary outcome measures will include a score of 36-Item Short Form Survey and Chinese Perceived Stress Scale. The secondary outcome measures will include body composition, cardiopulmonary exercise test, respiratory muscle function, locomotor skills, echocardiogram, New York Heart Association classification, heart rate recovery time and laboratory examination. Other measures also include Seattle Angina Scale, Pittsburgh Sleep Quality Index, Patient Health Questionnaire-9, Generalized Anxiety Disorder-7 and Berg Balance Scale. All adverse events will be recorded and analyzed.

**Ethics and dissemination:** This study conforms to the principles of the Declaration of Helsinki and relevant ethical guidelines. Ethical approval has been obtained from the Ethics Committee of Chinese PLA General Hospital (approval number S2019-060-02). Findings from this study will be published and presented at conferences for widespread dissemination of the results.

**Trial registration number:** ClinicalTrials.gov identifier: NCT03936504

---

### Strengths and limitations of this study:

- The proposed research study is unique and the first study about a Bafa Wubu of Tai Chi which is a new Tai Chi school.
- TCCRP in this study was specifically designed for patients with CCS.
- This is the first time for Tai Chi study to develop a comparative training system to match the conventional exercise.
- It is difficult to exclude the effect of other physical activity due to difficulty of monitoring.
- The blinding of participants is unachievable in this trial; however, efforts will be made to ensure that the data is blinded.

**Keywords:** Tai Chi, Coronary heart disease, Chronic coronary syndrom, Safety, Effectiveness, Randomized controlled trial, Exercise rehabilitation.

### INTRODUCTION

Coronary heart disease (CHD) remains the major cause of morbidity and mortality worldwide. CHD responsible for about one in every seven deaths; and, China Heart Society is predicted to continue until 2030, accounting for 14% of all deaths globally.<sup>1</sup> <sup>2</sup> Despite the use of effective Western medicine treatments, the incidence of CHD continues to rise and is associated with a high mortality rate. Cardiac rehabilitation (CR), especially exercise training is proven to significantly alleviate the cardiac symptoms, preserve the heart function, and improve the clinical outcomes. Therefore cardiac rehabilitation is recommended by many guidelines of different countries.<sup>3-9</sup> However, latest study demonstrated only 24.4% CR-eligible Medicare beneficiaries participated in CR and marked disparities were observed.<sup>10</sup> Besides limitation of medical resource, poor compliance of patients remains main reason. An effective and attractive CR training system is urgently needed.

These years the integration of Traditional Chinese medicine (TCM) with Western medicine to treat CHD has made great progress. As an effective complementary therapy, TCM has been demonstrated to improve the prognosis of CHD patients.<sup>11</sup> Tai Chi is an

1  
2  
3  
4 important element of TCM which combines the meridians and collateral theory, Yin-  
5 Yang theory and Five-element theory. Tai Chi exercise contains three core elements,  
6 namely “body”, “breath” and “mind”, as pronounced in Chinese as “Xing”, “Qi”, “Yi”  
7 respectively. The spirits of Tai Chi are summarized to “building the body”, “conveying  
8 the breath” and “using the mind”. Previous studies have shown that regular Tai Chi  
9 exercise was beneficial in improving psychological and physiological outcomes among  
10 CHD patients.<sup>12-15</sup> Study by Professor Salmorirago-Bloethcer have showed patients  
11 receiving Tai Chi exercise exhibited much better compliance than those receiving  
12 conventional exercise.<sup>12</sup>

13  
14  
15  
16  
17  
18  
19  
20  
21 There are many schools in Tai Chi such as the Yang-style, Wu-style, Chen-style,  
22 Wu-style and Sun-style, wherein each style takes a different approach in terms of the  
23 movements and forms. Furthermore, as Tai Chi exercise comprises many assorted  
24 movements that can be also complex to perform, it is difficult to popularize and simplify  
25 the exercise, especially in elderly patients and patients with chronic diseases.

26  
27  
28  
29  
30  
31 Based on prior insights of the Tai Chi movements obtained from our studies and  
32 other work,<sup>16 17</sup> our research team developed an innovative Tai Chi Cardiac  
33 Rehabilitation Program (TCCRP) specifically for CHD patients. However, as the value  
34 of TCCRP has not yet to be clinically proven, a clinical trial is required to validate the  
35 benefits of adopting this exercise for CHD patients.

36  
37  
38  
39  
40  
41 CHD can be categorized as either acute coronary syndrome (ACS) or chronic  
42 coronary syndrome (CCS) due to pathophysiological features and clinical prognosis  
43 because it is dynamic process of atherosclerotic plaque accumulation and functional  
44 alterations of coronary circulation<sup>18</sup>. Between the two process, most CHD patients stay  
45 in the CCS state. Latest studies revealed patients with CCS benefit a lot from cardiac  
46 rehabilitation programs characterized by life style therapy<sup>18</sup>. So we chose CCS patients  
47 as our subjects. This study aims to assess the efficacy, safety, and acceptability of  
48 TCCRP for CCS patients.

49  
50  
51  
52  
53  
54 The primary hypothesis is that TCCRP (the intervention group) will improve the life  
55 quality and reduce the stress when compared against conventional exercise  
56 rehabilitation (CER, the control group). Secondary objectives are to evaluate the effects  
57  
58  
59  
60



of the TCCRP on body composition, cardiopulmonary exercise test, respiratory muscle function, locomotor skills, echocardiogram, New York Heart Association (NYHA) classification, heart rate recovery time and laboratory examination. Other indicators measured will include Seattle Angina Scale (SAQ), Pittsburgh Sleep Quality Index (PSQI), Patient Health Questionnaire-9 (PHQ-9), Generalized Anxiety Disorder-7 (GAD-7), Berg Balance Scale (BBS) and major adverse cardiac events. Additional objectives to be explored will include: (1) the influence of potential factors on the adherence to the TCCRP; (2) the safety of the TCCRP and (3) individual experiences and acceptability following the TCCRP.

## **METHODS/DESIGN**

### **Study design**

This is a prospective, multicenter, randomized-controlled clinical trial comparing a TCCRP with CER with an allocation ratio of 1:1. The study period lasts for 6 months including a 3-month supervised intervention and a 3-month follow-up with the primary outcomes measured at baseline, 1 month, 3 months and 6 months. Secondary outcomes will be measured at baseline and after a 3-month intervention period.

This study is registered on ClinicalTrial.gov (NCT03936504). A brief flowchart of the entire study is shown in Figure 1 and the schedule of events is provided in Table 1.

### **Sample size calculation**

Sample size calculation will be based on the co-primary outcomes of the RCT. The SF-36 Health Survey (SF-36) and Chinese Perceived Stress Scale (CPSS) are being set as the co-primary outcome and used for sample size calculation. Sample size was calculated on the basis of the changes in the SF-36 and CPSS between comparison groups with a significance level of 5% and a two-tailed critical region to ensure the same effect size with 80% power by G\*power V.3.1.9.4 software. The means and their SDs (mean  $\pm$ SD) of the SF-36 and CPSS in the control and intervention group were (64.30 $\pm$ 13.11, 71.79 $\pm$ 16.03)<sup>19</sup> and (42.31 $\pm$ 8.17, 35.15 $\pm$ 6.82)<sup>20</sup>, respectively, at

postintervention according to the published literature. Because the sample size calculation of CPSS was less than SF-36, the sample size calculation of SF-36 was selected. This would require 122 participants, inflated to about 150 to account for the loss to follow-up of approximately 20% of participants, with 75 participants being assigned to each group.

## Participants

### Inclusion criteria

1. Male or non-pregnant women aged from 18 to 80 years;
2. Patients who met the diagnosis criteria of chronic coronary syndrome included in<sup>18</sup>;
3. NYHA class I, II;
4. Participants who understood the purpose of the clinical trial and voluntarily participate with signed informed consent.

### Exclusion criteria

1. Acute myocardial infarction (AMI) within 2 weeks;
2. Severe aortic stenosis;
3. Hypertrophic cardiomyopathy;
4. Severe valvular heart disease;
5. Malignant tachyarrhythmia;
6. Poor patient compliance and incompleteness of the clinical trial for not satisfying the requirements;
7. Patients with abnormal motor function caused by nervous system deterioration, motor system disease or rheumatic disease;
8. Those who regularly practice Tai Chi during the previous 3 months.

## Setting and Recruitment

This multicenter study will be performed at the Beijing Normal University in China.

1  
2  
3  
4 Recruitment and exercise training will occur at the Chinese PLA General Hospital,  
5 China, Beijing Shuili Hospital, China, and Anzhen Community Health Service Center,  
6 Beijing Chaoyang District, China. One hundred and fifty participants are to be recruited  
7 and the recruitment is scheduled to begin in October 2019. Combinations of advertising  
8 strategies include flyers within the hospital, advertisements in the print, online media,  
9 a major messaging platform (WeChat), clinics and databases.  
10  
11  
12  
13  
14  
15  
16

### 17 **Randomization, allocation concealment and blinding**

18  
19 After informed consent is signed, all patients will be randomized into either an  
20 intervention group receiving a 12-week TCCRP or a control group receiving CER. The  
21 random allocation sequence will be produced by an independent statistician via the  
22 PLAN sentences of the statistical software SAS 9.2 in a 1:1 ratio. Next, these  
23 assignments will be sent to a study staff member, exclusive to the study coordinator or  
24 principal investigator, who will store them into sealed, opaque envelopes with date and  
25 signature labels placed over the seals of the envelopes. The randomization envelopes  
26 will not be opened unless a participant meets eligibility criteria, completes the informed  
27 consent, and undergoes a baseline assessment. The study is conducted in 3 different  
28 cycles. Each cycle consists of a TCCRP group (intervention group) and CER group  
29 (control group). Each resulting group consists of 25 patients, equating to a 50 patients  
30 participating in each cycle, with a total of 150 patients over the course of the 3 cycles  
31 comprising the study. The instructors are randomly assigned to the 3 cycles.  
32  
33  
34  
35  
36  
37  
38  
39  
40  
41  
42  
43

44 Given the nature of the intervention, it is impossible to blind the patients or any  
45 personnel who are directly involved in conducting the programs. However, all outcome  
46 assessors, laboratory technicians, data managers and statisticians will be kept blind of  
47 the treatment allocations.  
48  
49  
50  
51  
52  
53

### 54 **Patient and Public Involvement**

55 We gave priority to patients as far as possible. Patients are the major factor to be  
56 consider when designing the trial, subject recruitment and data sharing. Since the very  
57 beginning of our study, we have constructed a Patient Public Involvement group.  
58  
59  
60

1  
2  
3 During the group meeting, Patient Public Involvement group members were informed  
4 about how the study will be conducted. We always take a lot of time to communicate  
5 with patients about how to improve the detail of study to improve their compliance and  
6 they have given some good advice. For example, the patients suggested us to prepare  
7 simple booklet to introduce our study during the outpatients visit and by internet, also  
8 to enlarge the recruitment extent by WeChat and app of our hospital. We planned to  
9 disseminate our research to the participants and the public, such as publicizing our  
10 research in hospital official accounts and various academic lectures.  
11  
12  
13  
14  
15  
16  
17  
18

## 19 **Interventions**

### 21 **Tai Chi cardiac rehabilitation program (TCCRP) group**

22 Patients in the intervention group will receive TCCRP conducted by a cardiac  
23 rehabilitation team consisting of cardiologists, cardiology nurses, Tai Chi coaches and  
24 research assistants. Procedures and activities of the TCCRP include: (1) Tai Chi  
25 exercise, (2) evaluation of exercise ability, (3) education covering topics related to the  
26 exercise, and (4) a series of adherence strategies.  
27  
28  
29  
30  
31  
32  
33  
34

### 35 **TCCRP pre-phase: a 2-week exercise before the start of exercise**

#### 36 1. TCCRP training

37 Six professional coaches with at least 10 years of Tai Chi teaching experience will  
38 be employed to teach and guide the participants' training. TCCRP will include (a)  
39 traditional Tai Chi warm-up exercises, followed by (b) Bafa Wubu of Tai Chi, (c) Tai  
40 Chi elastic belt exercise and (d) Tai Chi cool-down exercises.  
41  
42  
43  
44

45 (a) Tai Chi warm-up exercises (10 minutes) will include traditional breathing  
46 methods (full-body breathing), weight shifting, arm-swinging etc. These exercises will  
47 help release tension in the physical body, incorporate mindfulness and imagery into  
48 movement, increase breathing awareness and promote overall relaxation of the body  
49 and mind.  
50  
51  
52  
53

54 (b) The core Tai Chi movements (30 minutes) will be adapted from the Bafa Wubu  
55 of Tai Chi (also known as "eight methods and five footwork", Fig. 2), which include  
56 introductory routines to Tai Chi characterized with simple structures and rich  
57  
58  
59  
60

1  
2  
3  
4 connotations performed repetitively. Technically speaking, the “Bafa” consists eight  
5 hand techniques, namely “Peng (warding off), Lu (rolling back), Ji (pressing), An  
6 (pushing), Cai (pulling down), Lie (splitting), Zhou (elbowing) and Kao (shouldering”;  
7 while the “Wubu” consists five footwork, namely “Jin (advancement), Tui (retreat), Gu  
8 (shifting left), Pan (shifting right) and Ding (central equilibrium).  
9  
10  
11  
12

13 (c) Tai Chi combined with light-weight resistance band exercises(10 minutes) will  
14 include Tai Chi “Open and Close” movement, Tai Chi Spinning movement and Tai Chi  
15 Twining movement.  
16  
17  
18

19 (d) Tai Chi cool-down exercises (10 minutes) will include various relaxation methods,  
20 such as regulating breath, regulating body and regulating mind.  
21  
22

23 Patients are required to practice the TCCRP until they master it. Mastery will be  
24 determined by the professional coaches. The mastery of Tai Chi was assessed and  
25 quantified due to the following 6 factors: the body shape should keep straight and  
26 upright; the gravity center shift is right; the action moves in an order; moving speed has  
27 a sense of rhythm; action and movement contains wring and screwing; every set  
28 consumes similar time. We have constructed a testing committee including 10 Tai Chi  
29 exports who had discussed together and summerized a scoring criteria concerning the  
30 above 6 dimensions. Six professional coaches with more than 10 years of Tai Chi  
31 teaching experiences were trained about the scoring system and then coached the  
32 subjects. At the end of learning stage, 3 of coaches were chosen randomly to work as  
33 the examiner. The professional coaches scored on a percentile basis according to the  
34 above 6 dimensions. Only the participants who gained an average score higher than 80  
35 would be certificated to be qualified and move on the to the trial step.  
36  
37  
38  
39  
40  
41  
42  
43  
44  
45  
46  
47

## 48 2. Evaluation of exercise ability (week – 1 to week 0):

49 (a) Evaluation is conducted by cardiologists and physiotherapists;

50 (b) Evaluation is based on reviewing medical history, cardiopulmonary exercise test  
51 results and the performance of Tai Chi (heart rate and oxygen consumption will be  
52 recorded while performing Tai Chi);  
53  
54  
55  
56  
57

58 (c) Evaluation results will guide the goal-setting process during consultation;  
59  
60

- 
3. Education covering topics related to exercise:
    - (a) Basic knowledge of chronic heart disease,
    - (b) Basic knowledge of exercise-based cardiac rehabilitation.

### **TCCRP exercise phase: a 12-week intervention period**

Participants will perform the TCCRP 3 times a week for 12 weeks. Each training session is 60 minutes and includes Tai Chi warm-up exercises (10 minutes), Bafa Wubu of Tai Chi (30 minutes), Tai Chi combined with light-weight resistance band exercises (10 minutes) and Tai Chi cool-down exercises (10 minutes). All participants will be encouraged to practice Tai Chi according to an instructional video until the end of the 12-week period.

Researchers will record the subjects' heart rate and blood pressure before and after training. During the training, the exercise intensity will be assessed by the Borg Rating of Perceived Exertion Scale (RPE Scale),<sup>21</sup> which is a frequently used quantitative measure of perceived exertion during exercise.

### **TCCRP follow-up phase: a 12-week follow-up period**

After the 12-week TCCRP intervention, there will be a 12-week follow-up period that excludes any active rehabilitation. During the follow-up period, the participants will be asked to fill out forms to record the times and durations of their Tai Chi exercise or other physical activities and any incidence of a major adverse cardiac event. The forms will be returned to the researchers for follow-up each week by email or WeChat.

### **CER group (Control group)**

Participants in the control group will receive a CER 3 times a week for 12 weeks. Each training session lasts for 60 minutes, including ordinary warm-up exercises (10 minutes), aerobic activity (30 minutes), resistive exercise (10 minutes) and cool-down exercises (10 minutes). Each training session includes: (1) an active warm-up including

1  
2  
3  
4 arm-swinging, gentle stretches of the neck, shoulders, spine, arms and legs; (2) an  
5 aerobic activity comprising primarily cycle ergometer exercise; (3) resistive exercise  
6 mainly including resistance band exercises; and (4) a cool-down session involving  
7 active and static stretching exercises with primary body movements.  
8  
9  
10

11 The CER program is consistent with the current recommended guidelines of  
12 moderate intensity exercises (50 to 80% Heart Rate Reserve (HRR): Rated Perceived  
13 Exertion 11–13) for CHD patients. Our program is individually tailored to each  
14 participant alongside close supervision. The program will be introduced and increased  
15 in duration and intensity gradually to achieve the target of moderate-intensity exercise.  
16  
17  
18  
19  
20  
21  
22

### 23 **Concomitant treatment**

24 Participants in both groups will continue routine medications, such as aspirin,  
25 metoprolol, anti-platelet and anti-coagulant drugs or beta-adrenergic blockers,  
26 according to patients' respective conditions and will maintain their usual treatment  
27 visits throughout the study. All procedures and medication prescriptions will be  
28 determined by physicians following the clinical guidelines.<sup>22 23</sup> The specific date and  
29 reasons of any medical therapy changes will be recorded in the case report form (CRF).  
30  
31  
32  
33  
34  
35  
36  
37  
38

### 39 **Outcome measures**

40 All outcome measures will be collected by 3 research assistants at 2 weeks (baseline),  
41 1 month, 3 months (at the end of intervention) and 6 months (at the 3-month follow-  
42 up). Demographic information collected will include age, gender, ethnicity, marital  
43 status, education level, accommodation type and postal address. Clinical information  
44 will also be obtained from the patients' clinical records by a member of their hospital  
45 research team. All data collected from the assistants and therapists will be stored in a  
46 dedicated computer for the study and will be kept in a secure and lock-protected  
47 location.  
48  
49  
50  
51  
52  
53  
54  
55  
56  
57

### 58 **Primary outcome measures**



1. The SF-36 Health Survey (SF-36) is a multi-purpose, short-form health survey with only 36 questions.<sup>24</sup> SF-36 items cover eight domains: physical functioning, role limitations due to physical health problems, body pain, general health, vitality, social functioning, role limitations due to emotional problems and mental health. Higher scores indicate higher levels of health. SF-36 will be evaluated at baseline, 1 month, 3 months (at the end of intervention) and 6 months (at the 3-month follow-up).
2. Chinese Perceived Stress Scale (CPSS) is a self-rated questionnaire that assesses perceived stress.<sup>25</sup> CPSS consists 14 items that are divided into two categories: sense of tension and loss of control. Higher scores indicate higher levels of stress. CPSS will be evaluated at baseline, 1 month, 3 months (at the end of intervention) and 6 months (at the 3-month follow-up).

### Secondary outcome measures

1. Body composition measurements will include fat mass, body fat (percentage), fat-free mass and lean body mass. These measurements will be taken by bioelectrical impedance analysis using an Inbody 770 (Biospace Co) at baseline, 1 month, 3 months (at the end of intervention) and 6 months (at the 3-month follow-up).
2. Cardiopulmonary exercise test (CPET) is an objective method being increasingly used in a wide spectrum of clinical practice for assessing the functional capacity of CHD patients. Indexes include changes in  $VO_2$  peak and VAT and  $VE/VCO_2$  slope in the cardiopulmonary exercise test (CPET) at the end of the 3-month intervention.
3. Respiratory muscle function will be measured by POWER breath K-5. Indexes include changes in S-Index, Peak PIF of inspiratory velocity and power at the end of the 3-month intervention.
4. Locomotor skills includes handgrip strength, balance and flexibility. Handgrip strength, which is used to determine the maximum isometric strength of the hand and forearm muscles, will be measured using the handgrip strength dynamometer produced by CAMRY (product type EH101). The best result from repeated tests



of each hand will be recorded. The balance will be evaluated by using the time duration until losing balance. We respectively investigated the time duration of standing on one foot with eyes closed, standing on one foot with eyes open, strengthening Romberg's test<sup>26</sup>. The participants were tested three times to record their time until they lost their balance. Finally, the best of the three was selected. Time difference were calculated as the time duration after treatment minus that before treatment. Flexibility will be measured by seated forward flexion test. Locomotor skills will be evaluated at baseline and at the end of the 3-month intervention.

5. An echocardiogram comprising LVED Vi and LVEF using echocardiography will be assessed at baseline and at the end of the 3-month intervention. NYHA classification will also be evaluated at baseline and at the end of the 3-month intervention.
6. Heart rate recovery time will be measured. Heart rate recovery time will record heart rate 1 to 6 minutes after Tai Chi exercise, power cycling and resistance exercise.
7. A laboratory examination will be performed that includes glycolipid metabolism, inflammatory factor level, immunologic function and oxidative stress index. The laboratory examination will be evaluated at baseline and at the end of the 3-month intervention.
8. The Berg Balance Scale (BBS) is a widely used clinical test of a person's static and dynamic balance abilities<sup>27</sup>, and comprises of a set of 14 simple balance related tasks, ranging from standing up from a sitting position to standing on one foot. Total score ranges from 0 to 56, with 0 to 20 corresponding to a high fall risk, 21 to 40 a medium fall risk and 41 to 56 a low fall risk. The Berg Balance Scale will be evaluated at baseline and at the end of the 3-month intervention.
9. The Pittsburgh Sleep Quality Index (PSQI) is a self-rated questionnaire that assesses sleep quality and disturbances.<sup>28</sup> It contains 19 self-answered questions for the subject and 5 peer-answered questions for the bed partner or a roommate (if

one is available). The scores from seven categories are added to calculate the index, ranging from 0 to 21. A score of zero indicates no disturbance in sleep or good sleep quality, whereas higher scores indicate poorer sleep quality. The PSQI will be evaluated at baseline and at the end of the 3-month intervention.

10. Patient Health Questionnaire-9 (PHQ-9) and Generalized Anxiety Disorder-7(GAD-7) are validated self-answered questionnaires that assess levels of depression and anxiety. Higher scores reflect greater levels of anxiety and depression. PHQ-9 and GAD-7 will be evaluated at baseline and at the end of the 3-month intervention.
11. The Seattle Angina Score (SAQ) will be used to determine the total number of 9 problems and the 5 aspects of CAD, including the degree of physical activity, the stability and frequency of angina, the degree of satisfaction of the treatment, and the perception of the disease. The higher the score, the better the quality of life and body function. SAQ will be measured at baseline and at the end of the 3-month intervention.
12. A record will be made of any side effects and possible adverse reactions arising from the intervention.

### **Safety measurements**

All study participants are monitored weekly during the study intervention for the occurrence of adverse events defined by any undesirable experience. All adverse events that occur during the study will be recorded on the Adverse Event Case Report Form and will be evaluated for relevance to the intervention. All adverse events will also be reported to the Human Research Committee promptly in accordance with guidelines.

Only patients who are eligible and capable of completing the test will undergo a Cardiopulmonary Exercise Test (CPET). For enrolled patients meeting the rehabilitation training standards, they will be stratified according to the degree of motion risk and appropriate exercise intensity and time will be adjusted based on their risk stratification. Before the cardiac rehabilitation exercise, researchers will educate

1  
2  
3  
4 patients about the CHD rehabilitation exercises, including training contraindications  
5 and exercise advisories regarding the respective CER and TCCRP exercises. Moreover,  
6 the cardiac rehabilitation Center of Chinese PLA General Hospital, Beijing Shuili  
7 Hospital and Anzhen Community Health Service Center are equipped with a  
8 comprehensive set of rescue equipment. A thorough contingency plan and rescue  
9 procedure for cardiovascular events has also been formulated prior to the  
10 commencement of the research. Should an adverse event occur during the exercise, the  
11 researchers will immediately initiate the contingency plan to circumvent the occurrence  
12 of any fatal outcomes.  
13  
14  
15  
16  
17  
18  
19  
20  
21  
22

### 23 **Data management and monitoring**

24 Beijing Normal University will be responsible for monitoring research progress,  
25 managing the data and performing statistical analyses. The research assistants will be  
26 responsible for checking the integrity of the completed CRF and for timely entry of the  
27 collected data into the EpiData Manager, a free data management software. The project  
28 manager will be responsible for initial data cleaning, identifying, coding and converting  
29 the data into the proper format for analysis. All investigators involved in data  
30 management and analysis will be blinded to treatment allocation.  
31  
32  
33  
34  
35  
36  
37  
38  
39  
40

### 41 **Statistical analysis**

42 Continuous variables will be described as mean  $\pm$  standard deviation (SD) for normal  
43 distributions or median for non-normal distributions, categorical variables will be  
44 described as frequency. Baseline data mainly describe the clinical characteristic and  
45 features of the subjects. We also tested the equalization of the two groups of variables.  
46 Continuous variables will be described as a two-sample Student's t-test for normal  
47 distributions or Wilcoxon test for non-normal distributions. Categorical variables will  
48 be described as the chi-square test. The group difference between intervention and  
49 control group at each time point (4 and 12 weeks after intervention or 12-week follow-  
50 up period) will be analysed using Student's t-test or Mann-Whitney U-test. A two-way  
51  
52  
53  
54  
55  
56  
57  
58  
59  
60

1  
2  
3  
4 analysis of variance with repeated measures will be used to determine the effects of  
5 time and group on our dependent variables. A Bonferroni-adjusted post hoc analysis  
6 will be conducted when time-group interaction was detected. The analysis of primary  
7 or secondary outcomes will be based on an intention to treat (ITT) principle, and  
8 participants who either drop out from the study or fail to adhere to the protocol will  
9 have their last known data carried forward. The missing data will be imputed using a  
10 multiple imputation method. All data will be analyzed with SPSS 21.0 (IBM, Chicago,  
11 IL, USA) software packages. Statistical significance is defined as a two-sided  $P$  value  
12  $< 0.05$ .  
13  
14  
15  
16  
17  
18  
19  
20  
21  
22

### 23 **Adherence**

24 During the 3-month treatment period, participants will be asked to practice strictly  
25 according to the training program and will not be allowed to take part in any new or  
26 additional exercise programs. Throughout the 3-month intervention period, the  
27 researchers will track the number of missed sessions for each participant during the  
28 intervention period. Participants' attendance will be monitored during each in-person  
29 session by staff-completed attendance forms and class sign-in sheets. The percentage  
30 of compliance will be documented on the case report form. The rate of patient  
31 compliance = (total planned number of times – number of absence) / total number of  
32 times  $\times 100\%$ . A compliance rate of 80% or greater will be considered as good, whereas  
33 a compliance rate of less than 80% is considered as poor. An attendance of less than 20%  
34 will be considered as a dropout from the study.  
35  
36  
37  
38  
39  
40  
41  
42  
43  
44  
45  
46  
47

### 48 **DISCUSSION**

49 The development of an ideal and effective cardiac rehabilitation program is still being  
50 explored and current cardiac rehabilitation mainly consists of contemporary  
51 conventional exercises. In fact, current cardiac rehabilitation programs have been  
52 reported to be underdeveloped and limited, reflected by a poor level of involvement  
53 with less than 30% of patients participating in the existing offerings.<sup>29</sup> As such, there is  
54  
55  
56  
57  
58  
59  
60

1  
2  
3  
4 an unmet need for reforms and the provision of alternative cardiac rehabilitation  
5 programs to encourage the growth of cardiac rehabilitation. The exploration of an ideal  
6 cardiac rehabilitation exercise that is most beneficial for CCS patients should be  
7 determined.  
8  
9  
10

11 This trial is the first one to compare the safety, feasibility and benefits of TCCRP  
12 and CER in CCS patients. There are several strengths of our trial: Firstly, the proposed  
13 research study is unique and the first study about a Bafa Wubu of Tai Chi which is a  
14 new Tai Chi school. Secondly, TCCRP in this study was specifically designed for  
15 patients with CCS. Finally, this is the first time for Tai Chi study to develop a  
16 comparative training system to match the conventional exercise. Our study will supply  
17 scientific evidence for the promotion of Bafa Wubu of Tai Chi at home and abroad.  
18  
19  
20  
21  
22  
23  
24

25 TCCRP has some features which make it more suitable for CCS patients. Firstly, the  
26 intensity of TCCRP is low, and it is much safer for patients with CCS. Secondly,  
27 TCCRP is much easier to be learned and possesses a simple structure of movements, a  
28 reasonable number of postures, and fewer practice environment limitations. Thirdly,  
29 TCCRP is not limited by location and easy to be carried out. Finally, TCCRP doesn't  
30 need money or any equipment. To sum up, compared with conventional exercise  
31 rehabilitation (CER), TCCRP is more suitable for CCS patients.  
32  
33  
34  
35  
36  
37  
38

39 Compared with conventional exercise styles (e.g. aerobic, resistance, and  
40 extensibility exercise), Tai Chi typically involves a mind–body integration practice that  
41 combines the coordination of slow movements with mental focus, deep breathing, and  
42 relaxation for promoting both physical and mental well-being.<sup>30-32</sup> Previous studies  
43 have shown that regular Tai Chi exercise is beneficial in improving psychological and  
44 physiological outcomes among the elderly and various clinical populations (e.g.  
45 Parkinson's disease, diabetes mellitus, hypertension, chronic obstructive pulmonary  
46 disease (COPD) and psychological illness).<sup>33-36</sup> As a typical mind–body exercise which  
47 incorporates the characteristics of Traditional Chinese Medicine, Tai Chi may be  
48 considered to be an effective exercise to promote health in a diverse range of  
49 populations (e.g. healthy population, patients with chronic diseases, youths, middle-  
50  
51  
52  
53  
54  
55  
56  
57  
58  
59  
60

aged or elderly adults).<sup>37 38</sup>

Compared with other Tai Chi schools, TCCRP has distinct advantages for CCS patients. TCCRP utilized Bafa Wubu of Tai Chi, namely, introductory routines to Tai Chi characterized by simple structures. Of the many styles of Tai Chi, however, it is hard to further popularize and generalize, due to its numerous movements and complexity, especially among patients with CCS. By upholding scientific, standardized and simplified principles, the Bafa Wubu of Tai Chi is systematically refined and sorted out on the basis of the other forms of Tai Chi, and the two exercise forms of “standing” and “marching”, thus forming a set of Tai Chi routines for popularization characterized by culture, fitness and simplicity. Compared with the others, Bafa Wubu of Tai Chi is safer and much easier to be mastered for patients with CCS.

It should be acknowledged that this study has several limitations. It is difficult to monitor any additional physical activity of participants during the study duration. Although all participants will be required to record their daily physical activity or exercise information with a pedometer, this is not sufficiently accurate to track their daily activity intensity. Furthermore, due to the nature of the exercise interventions (Tai Chi versus CER), the blinding of participants is unachievable in this trial. However, every effort will be made to ensure that the outcome assessors, data managers and statisticians participating in this study will be kept blind of the treatment allocations.

In conclusion, this study aims to assess the efficacy, safety and acceptability of an innovative TCCRP for CCS patients. The finding will be vital to help establish an optimal cardiac rehabilitation program for treating CCS patients.

## **TRIAL STATUS**

This trial is currently in the recruitment phase. Estimated completion of the trial is expected to be completed by December 2020.

## **Additional files**

## **Abbreviations**

1  
2  
3  
4 CHD: coronary heart disease; CCS: chronic coronary syndrome; ACS: acute coronary  
5 syndromes; TCCRP: Tai Chi cardiac rehabilitation program; TCM: Traditional Chinese  
6 Medicine; CER: conventional exercise rehabilitation.  
7  
8  
9

### 10 11 **Author affiliations**

12  
13 1 College of Physical Education and Sports, Beijing Normal University, Beijing, China

14  
15 2 Department of Cardiovascular Medicine, Military General Hospital of Beijing PLA,  
16 Beijing, China  
17

18  
19 3 Anzhen Community Health Service Center, Chaoyang District, Beijing, China

20  
21 4 Department of Cardiovascular Medicine, Beijing Shuili Hospital, Beijing, China

22  
23 5 College of Wushu, Beijing Sports University, Beijing, China  
24  
25

### 26 27 **Authors' contributions**

28  
29 LSJ, MJ, and YHC conceived and designed the study protocol. The individual  
30 interviews were conducted by MJ, LH, ZLS, and GAY. ZJW and MJ performed the  
31 translation and analysed the data. ZJW, YW, CZH, WQY, CMZ, LYM, LYL, GTM,  
32 LCH, SB and WHW guided and supervised the Tai Chi training. MJ and ZJW  
33 contributed to writing and reading the manuscript. All authors approved the final  
34 manuscript.  
35  
36  
37  
38  
39  
40  
41  
42

### 43 44 **Acknowledgements**

45  
46 The authors most gratefully thank the physicians and nurses of the Chinese PLA  
47 General Hospital, Beijing Shuili Hospital and Anzhen Community Health Service  
48 Center, Chaoyang District, Beijing. Thank you for effort working as numbers of Patient  
49 Public Involvement group, such as Weiling Guo, Wu Feng, Haibin Wang, Yong Ma  
50 and Jijun Li.  
51  
52  
53  
54  
55

### 56 57 **Funding**

58  
59 This work is financially supported by National Key R&D Program of  
60



China(2018YFC2000600) and Finance Department of the State Administration of Traditional Chinese Medicine (GZY-GCS-2018-011) and the Wushu Research Institute of the General Administration of Sport of China (WSH2018A004).

### Competing interests

The authors declare that they have no competing interests.

### Provenance and peer review

Not commissioned; externally peer reviewed.

### Data sharing statement

The data capture system and web servers will be provided by the data management center of Beijing Normal University (<http://cas.bnu.edu.cn/cas/login>) and the data management belongs to the Wushu and National Traditional Sports Culture Promotion Research Center of Beijing Normal University. The results of the review will be disseminated through peer-reviewed publications.

### Open Access

This is an open access article distributed in accordance with the Creative Commons Attribution Non Commercial (CC BY-NC 4.0) license, which permits others to distribute, remix, adapt, build upon this work non-commercially, and license their derivative works on different terms, provided the original work is properly cited and the use is non-commercial. See: <http://creativecommons.org/licenses/by-nc/4.0/>

© Article author(s) (or their employer(s) unless otherwise stated in the text of the article) 2019. All rights reserved. No commercial use is permitted unless otherwise expressly granted.

### REFERENCES

1. Lozano R, Naghavi M, Foreman K, et al., Global and regional mortality from 235 causes of death for 20 age groups in 1990 and 2010: a systematic analysis for the Global Burden of Disease Study 2010. *Lancet* 2012; 380:2095-128.
2. Mirzaei M, Truswell AS, Taylor R, Leeder SR. Coronary heart disease epidemics: not all the same. *Heart* 2009; 95:740-6.



3. Taylor RS, Brown A, Ebrahim S, et al. Exercise-based rehabilitation for patients with coronary heart disease: systematic review and meta-analysis of randomized controlled trials. *Am J Med* 2004; 116:682–692.
4. Goel K, Lennon RJ, Tibury RT, et al. Impact of cardiac rehabilitation on mortality and cardiovascular events after percutaneous coronary intervention in the community. *Circulation* 2011;123:2344-52.
5. Suaya JA, Stason WB, Ades PA, et al. Cardiac rehabilitation and survival in older coronary patients. *J Am Coll Cardiol* 2009; 54:25–33
6. Taylor RS, Brown A, Ebrahim S, et al. Exercise-based rehabilitation for patients with coronary heart disease: systematic review and meta-analysis of randomized controlled trials. *Am J Med* 2004;116:682-92.
7. Smith SCJr, Benjamin EJ, Bonow RO, et al. World Heart Federation and the Preventive Cardiovascular Nurses Association. AHA/ACCF Secondary Prevention and Risk Reduction Therapy for Patients with Coronary and other Atherosclerotic Vascular Disease: 2011 update: a guideline from the American Heart Association and American College of Cardiology Foundation. *Circulation* 2011;124:2458–2473.
8. 2011 ACCF/AHA/SCAI Guideline for Percutaneous Coronary Intervention. A report of the American College of Cardiology Foundation/American Heart Association Task Force on Practice Guidelines and the Society for Cardiovascular Angiography and Interventions. *J Am Coll Cardiol* 2011;58: e44–e122.
9. Piepoli MF, Hoes AW, Agewall S, et al. 2016 European Guidelines on cardiovascular disease prevention in clinical practice: The Sixth Joint Task Force of the European Society of Cardiology and Other Societies on Cardiovascular Disease Prevention in Clinical Practice (constituted by representatives of 10 societies and by invited experts developed with the special contribution of the European Association for Cardiovascular Prevention & Rehabilitation (EACPR). *Eur Heart J* 2016;37:2315–2381.
10. Ritchey MD, Maresh S, McNeely J, et al. Tracking cardiac rehabilitation participation and completion among medicare beneficiaries to inform the efforts of a national initiative. *Circ Cardiovasc Qual Outcomes* 2020. 13(1): e005902.
11. Tao T, He T, Wang X, Liu X. Metabolic profiling analysis of patients with coronary heart disease undergoing Xuefu Zhuyu decoction treatment. *Front Pharmacol* 2019; 10:985.
12. Salmoirago-Blotcher E, Wayne PM, Dunsiger S, et al. Tai Chi is a promising exercise option for patients with coronary heart disease declining cardiac rehabilitation. *J Am Heart Assoc* 2017;6(10).
13. Taylor-Piliae RE, Silva E, Sheremeta SP. Tai Chi as an adjunct physical activity for adults aged 45 years and older enrolled in phase III cardiac rehabilitation. *Eur J Cardiovasc Nurs* 2012; 11:34-43.
14. Sato S, Makita S, Uchida R, Ishihara S, Masuda M. Effect of Tai Chi training on baroreflex sensitivity and heart rate variability in patients with coronary heart disease. *Int Heart J* 2010; 51:238-41.
15. Liu T, Chan A W, Liu Y H, Taylor-Piliae RE. Effects of Tai Chi-based cardiac rehabilitation on aerobic endurance, psychosocial well-being and cardiovascular risk reduction among patients with coronary heart disease: A systematic review and meta-analysis. *Eur J Cardiovasc Nurs* 2018; 17:368-83.
16. Jianwei Zhang, Shaojun Lyu, Ji Wang, et al. A comparative study on the therapeutic effect of Taijiquan on patients with type 2 diabetes mellitus of different

- genders. *J Beijing Normal University (Nat Sci Ed)* 2019;55:545-50.
17. Shaojun Lyu. *Bafa Wubu of Tai Chi*. Beijing: Beijing Sport University Press. 2018;18-20.
  18. Juhani Knuuti, William Wijns, Antti Saraste, et al. 2019 ESC Guidelines for the diagnosis and management of chronic coronary syndromes: The Task Force for the diagnosis and management of chronic coronary syndromes of the European Society of Cardiology (ESC). *Eur Heart J*, 2020;41(3):407-477.
  19. Salvetti XM, Oliveira JA, Servantes DM, et al. How much do the benefits cost? Effects of a home-based training programme on cardiovascular fitness, quality of life, programme cost and adherence for patients with coronary disease. *Clin Rehabil*, 2008. 22(10-11):987-96.
  20. Zhe Xu. Study on the perioperative nursing practice of TCM auricular compression combined with mindfulness meditation training in patients with colorectal cancer. *J Liaoning Univ Tradit Chin Med*, 2020.22(02):218-220.
  21. Borg GA. Psychophysical bases of perceived exertion. *Med Sci Sports Exerc* 1982;14:377-81
  22. Fletcher GF, Ades PA, Kligfield P, et al. Exercise standards for testing and training: a scientific statement from the American Heart Association. *Circulation* 2013;128:873-934.
  23. Piepoli MF, Conraads V, Corrà U, et al. Exercise training in heart failure: from theory to practice. A consensus document of the Heart Failure Association and the European Association for Cardiovascular Prevention and Rehabilitation. *Eur J Heart Fail* 2011;13:347-57.
  24. Ware JE Jr, Gandek B. Overview of the SF-36 Health Survey and the International Quality of Life Assessment (IQOLA) Project. *J Clin Epidemiol* 1998;51:903-12.
  25. Yang T. Psychological stress of urban population in social transition. *Chin J Epidemiol* 2002;(6):64-6.
  26. Yonghao You, Ailing Wen. Human balance assessment method. *Chin J Rehabil Med* 2014;29(11):1099-1104.
  27. Berg K, Wood-Dauphinee S, Williams JI. The balance scale: reliability assessment for elderly residents and patients with an acute stroke. *Scand J Rehab Med* 1995;27:27-36.
  28. Buysse DJ, Reynolds III CF, Monk TH, et al. The Pittsburgh Sleep Quality Index: a new instrument for psychiatric practice and research. *Psychiatry Res* 1989;28:193-213.
  29. Gruyter E D, Ford G and Stavreski B. Economic and social impact of increasing uptake of cardiac rehabilitation services – A Cost Benefit Analysis. *Heart Lung Circ* 2016;25:175-83.
  30. Nery RM, Zanini M, Ferrari JN, et al., Tai Chi Chuan for cardiac rehabilitation in patients with coronary arterial disease. *Arq Bras Cardiol* 2014;102:588-92.
  31. Yang YL, Wang YH, Wang, SR, et al. The effect of Tai Chi on cardiorespiratory fitness for coronary disease rehabilitation: A Systematic Review and Meta-Analysis. *Front Physiol* 2018; 8:1091.
  32. Lan C, Chen SY, Lai JS, et al. The effect of Tai Chi on cardiorespiratory function in patients with coronary artery bypass surgery. *Med Sci Sports Exerc* 1999;31:634-8.
  33. Chang RY, Koo M, Yu ZR, et al. The effect of Tai Chi exercise on autonomic nervous function of patients with coronary artery disease. *J Altern Complement Med* 2008; 14:1107-13.

- 
- 1  
2  
3 34. Gao Q, Leung A, Yang Y, et al. Effects of Tai Chi on balance and fall prevention  
4 in Parkinson's disease: a randomized controlled trial. *Clin Rehabil* 2014; 28:748-  
5 53.  
6  
7 35. Xiao CM, Zhuang YC. Effects of Tai Chi ball on balance and physical function in  
8 older adults with type 2 diabetes mellitus. *J Am Geriatr Soc* 2015;63):176-7.  
9  
10 36. Chan AW, Lee A, Lee DT, et al. The sustaining effects of Tai chi Qigong on  
11 physiological health for COPD patients: a randomized controlled trial.  
12 *Complement Ther Med* 2013; 21:585-94.  
13  
14 37. Chen WW, Sun WY. Tai chi chuan, an alternative form of exercise for health  
15 promotion and disease prevention for older adults in the community. *Int Q*  
16 *Community Health Educ* 1996; 16:333-9.  
17  
18 38. Guo JB, Chen BL, Lu YM, et al. Tai Chi for improving cardiopulmonary function  
19 and quality of life in patients with chronic obstructive pulmonary disease: a  
20 systematic review and meta-analysis. *Clin Rehabil* 2016;30:750-64.  
21  
22  
23  
24  
25  
26  
27  
28  
29  
30  
31  
32  
33  
34  
35  
36  
37  
38  
39  
40  
41  
42  
43  
44  
45  
46  
47  
48  
49  
50  
51  
52  
53  
54  
55  
56  
57  
58  
59  
60

**Table 1:** Schedule for data collection; outcome measures per visits

| Items                           | Phase I:<br>Screening | Phase II:<br>Baseline | Phase III:<br>Month 1 | Phase IV:<br>Month 3 | Phase<br>V:<br>Month 6 |
|---------------------------------|-----------------------|-----------------------|-----------------------|----------------------|------------------------|
| Inclusion/exclusion criteria    | √                     |                       |                       |                      |                        |
| Diagnostic index                | √                     |                       |                       |                      |                        |
| Signed informed consent         | √                     |                       |                       |                      |                        |
| Randomization and allocation    | √                     |                       |                       |                      |                        |
| Safety index                    | √                     | √                     | √                     | √                    |                        |
| General clinical information    |                       | √                     |                       | √                    |                        |
| Primary outcomes                |                       | √                     |                       | √                    |                        |
| Secondary outcomes              |                       | √                     |                       | √                    |                        |
| Other indicators                |                       | √                     |                       | √                    |                        |
| Recurrent cardiovascular events |                       |                       | √                     | √                    | √                      |
| Adherence                       |                       |                       | √                     | √                    | √                      |
| Adverse events                  |                       |                       | √                     | √                    |                        |
| Summary at the end of the study |                       |                       |                       |                      | √                      |

**Figure legend**

Figure 1: Flow diagram of study design

SF-36 means the SF-36 Health Survey; CPSS means Chinese Perceived Stress Scale; NYHA means New York Heart Association; SAQ means Seattle Angina Scale; PSQI means Pittsburgh Sleep Quality Index; PHQ-9 means Patient Health Questionnaire-9; GAD-7 means Generalized Anxiety Disorder-7; BBS means Berg Balance Scale.

---

1  
2  
3 Figure. 2: Exemplary Bafa Wubu of Tai Chi; the pictures have taken the portrait right;  
4 the fuggleman is the developer of TCCRCP.  
5

6 The “Bafa” consisted of eight hand techniques were shown in figure 2. Each figure  
7 showed each hand technique, namely “Peng (warding off), Lu (rolling back), Ji  
8 (pressing), An (pushing), Cai (pulling down), Lie (splitting), Zhou (elbowing) and Kao  
9 (shouldering)”.  
10  
11  
12  
13  
14  
15  
16  
17  
18  
19  
20  
21  
22  
23  
24  
25  
26  
27  
28  
29  
30  
31  
32  
33  
34  
35  
36  
37  
38  
39  
40  
41  
42  
43  
44  
45  
46  
47  
48  
49  
50  
51  
52  
53  
54  
55  
56  
57  
58  
59  
60

For peer review only

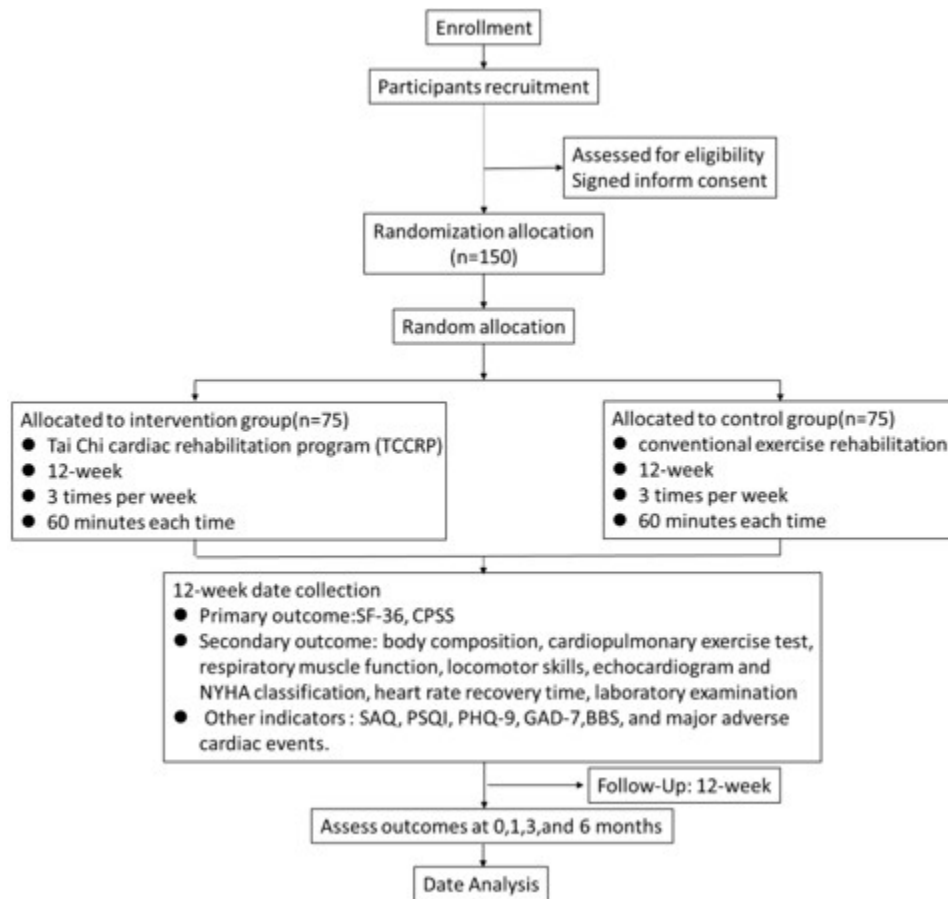

Figure 1: Flow diagram of study design

126x119mm (96 x 96 DPI)

1  
2  
3  
4  
5  
6  
7  
8  
9  
10  
11  
12  
13  
14  
15  
16  
17  
18  
19  
20  
21  
22  
23  
24  
25  
26  
27  
28  
29  
30  
31  
32  
33  
34  
35  
36  
37  
38  
39  
40  
41  
42  
43  
44  
45  
46  
47  
48  
49  
50  
51  
52  
53  
54  
55  
56  
57  
58  
59  
60

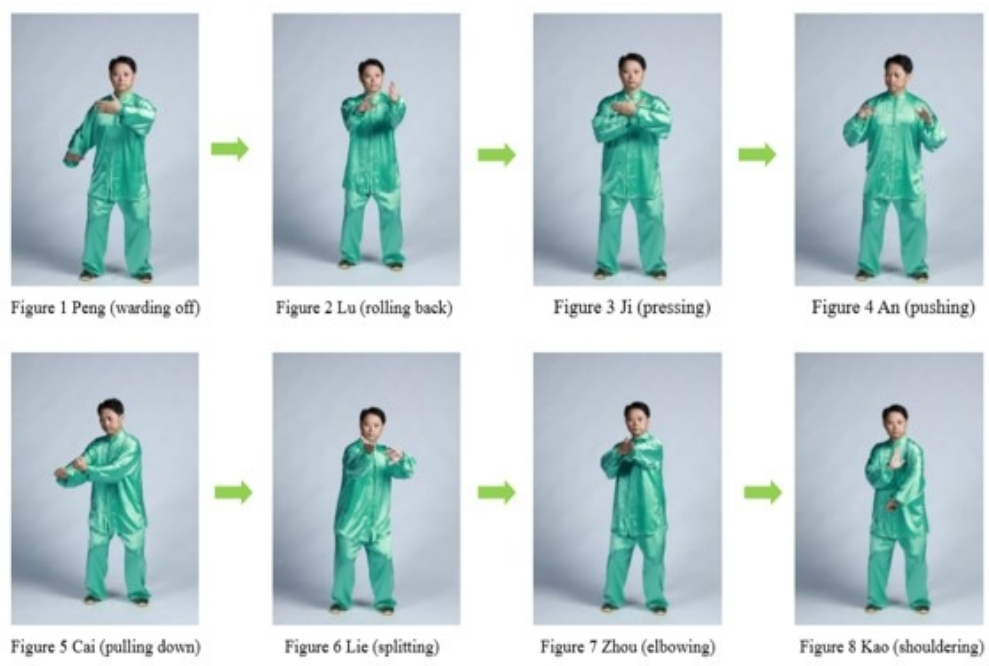

Figure. 2: Exemplary Bafa Wubu of Tai Chi; the pictures have taken the portrait right; the fugleman is the developer of TCCRP.

149x99mm (96 x 96 DPI)

# BMJ Open

## Safety and Effectiveness of a TaiChi-based Cardiac Rehabilitation Program for Chronic Coronary Syndrome Patients: Study Protocol for a Randomized Controlled Trial

|                                 |                                                                                                                                                                                                                                                                                                                                                                                                                                                                                                                                                                                                                                                                                                                                                                                                                                                                                                                                                                                                                                                                                                                                                                                                                                                                                                                                                                                                                                                            |
|---------------------------------|------------------------------------------------------------------------------------------------------------------------------------------------------------------------------------------------------------------------------------------------------------------------------------------------------------------------------------------------------------------------------------------------------------------------------------------------------------------------------------------------------------------------------------------------------------------------------------------------------------------------------------------------------------------------------------------------------------------------------------------------------------------------------------------------------------------------------------------------------------------------------------------------------------------------------------------------------------------------------------------------------------------------------------------------------------------------------------------------------------------------------------------------------------------------------------------------------------------------------------------------------------------------------------------------------------------------------------------------------------------------------------------------------------------------------------------------------------|
| Journal:                        | <i>BMJ Open</i>                                                                                                                                                                                                                                                                                                                                                                                                                                                                                                                                                                                                                                                                                                                                                                                                                                                                                                                                                                                                                                                                                                                                                                                                                                                                                                                                                                                                                                            |
| Manuscript ID                   | bmjopen-2019-036061.R2                                                                                                                                                                                                                                                                                                                                                                                                                                                                                                                                                                                                                                                                                                                                                                                                                                                                                                                                                                                                                                                                                                                                                                                                                                                                                                                                                                                                                                     |
| Article Type:                   | Protocol                                                                                                                                                                                                                                                                                                                                                                                                                                                                                                                                                                                                                                                                                                                                                                                                                                                                                                                                                                                                                                                                                                                                                                                                                                                                                                                                                                                                                                                   |
| Date Submitted by the Author:   | 16-Mar-2020                                                                                                                                                                                                                                                                                                                                                                                                                                                                                                                                                                                                                                                                                                                                                                                                                                                                                                                                                                                                                                                                                                                                                                                                                                                                                                                                                                                                                                                |
| Complete List of Authors:       | <p>Ma, Jing; Military General Hospital of Beijing PLA, Department of Cardiovascular Medicine</p> <p>Zhang, Jian; Beijing Normal University, college of P.E and sports</p> <p>Li, Hua; Anzhen Community Health Service Center, Chaoyang District, Department of Cardiovascular Medicine</p> <p>Zhao, Lian; Beijing Shuili Hospital, Department of Cardiovascular Medicine</p> <p>Guo, Ai; Anzhen Community Health Service Center, Chaoyang District, Department of Cardiovascular Medicine</p> <p>Chen, Zai; Beijing Sport University, College of Wushu</p> <p>Yuan, Wen; Beijing Sport University, College of Wushu</p> <p>Gao, Tian; Beijing Normal University, College of Physical Education and Sports</p> <p>Li, Ya; Beijing Normal University, College of Physical Education and Sports</p> <p>Li, Cui; Beijing Sport University, College of Wushu</p> <p>Wang, Hong; Beijing Normal University, College of Physical Education and Sports</p> <p>Song, Bo; Beijing Normal University, College of Physical Education and Sports</p> <p>Lu, Yu; Beijing Normal University; Longyan University</p> <p>Cui, Mei; Beijing Normal University, College of Physical Education and Sports</p> <p>Wei, Qiu; Beijing Normal University, College of Physical Education and Sports</p> <p>Lyu, Shao; Beijing Normal University, College of Physical Education and Sports</p> <p>Yin, Heng; Beijing Normal University, College of Physical Education and Sports</p> |
| <b>Primary Subject Heading</b>: | Sports and exercise medicine                                                                                                                                                                                                                                                                                                                                                                                                                                                                                                                                                                                                                                                                                                                                                                                                                                                                                                                                                                                                                                                                                                                                                                                                                                                                                                                                                                                                                               |
| Secondary Subject Heading:      | Complementary medicine, Cardiovascular medicine, General practice / Family practice, Rehabilitation medicine, Evidence based practice                                                                                                                                                                                                                                                                                                                                                                                                                                                                                                                                                                                                                                                                                                                                                                                                                                                                                                                                                                                                                                                                                                                                                                                                                                                                                                                      |
| Keywords:                       | Coronary heart disease < CARDIOLOGY, SPORTS MEDICINE, COMPLEMENTARY MEDICINE, EDUCATION & TRAINING (see Medical Education & Training), REHABILITATION MEDICINE, Clinical trials < THERAPEUTICS                                                                                                                                                                                                                                                                                                                                                                                                                                                                                                                                                                                                                                                                                                                                                                                                                                                                                                                                                                                                                                                                                                                                                                                                                                                             |



1  
2  
3  
4  
5  
6  
7  
8  
9  
10  
11  
12  
13  
14  
15  
16  
17  
18  
19  
20  
21  
22  
23  
24  
25  
26  
27  
28  
29  
30  
31  
32  
33  
34  
35  
36  
37  
38  
39  
40  
41  
42  
43  
44  
45  
46  
47  
48  
49  
50  
51  
52  
53  
54  
55  
56  
57  
58  
59  
60



SCHOLARONE™  
Manuscripts



I, the Submitting Author has the right to grant and does grant on behalf of all authors of the Work (as defined in the below author licence), an exclusive licence and/or a non-exclusive licence for contributions from authors who are: i) UK Crown employees; ii) where BMJ has agreed a CC-BY licence shall apply, and/or iii) in accordance with the terms applicable for US Federal Government officers or employees acting as part of their official duties; on a worldwide, perpetual, irrevocable, royalty-free basis to BMJ Publishing Group Ltd ("BMJ") its licensees and where the relevant Journal is co-owned by BMJ to the co-owners of the Journal, to publish the Work in this journal and any other BMJ products and to exploit all rights, as set out in our [licence](#).

The Submitting Author accepts and understands that any supply made under these terms is made by BMJ to the Submitting Author unless you are acting as an employee on behalf of your employer or a postgraduate student of an affiliated institution which is paying any applicable article publishing charge ("APC") for Open Access articles. Where the Submitting Author wishes to make the Work available on an Open Access basis (and intends to pay the relevant APC), the terms of reuse of such Open Access shall be governed by a Creative Commons licence – details of these licences and which [Creative Commons](#) licence will apply to this Work are set out in our licence referred to above.

Other than as permitted in any relevant BMJ Author's Self Archiving Policies, I confirm this Work has not been accepted for publication elsewhere, is not being considered for publication elsewhere and does not duplicate material already published. I confirm all authors consent to publication of this Work and authorise the granting of this licence.

**ID :** 2019-036061

**Journal :** 《BMJ Open》

**(1) Article Title:**

Safety and Effectiveness of a TaiChi-based Cardiac Rehabilitation Program for Chronic Coronary Syndrom Patients: Study Protocol for a Randomized Controlled Trial

**(2) First-Author**

Jing Ma , Dr

Department of Cardiology

First Medical Center of Chinese People's Liberation Army General Hospital,

No. 28, Fuxing road, Haidian district, Beijing

Zip code: 100853 E-mail: [crystalma@126.com](mailto:crystalma@126.com)

**Co- First-Author**

Jianwei Zhang , PhD

Beijing Normal University

College of Physical Education and Sports

No.19 Xijiekou wai street Haidian district, Beijing

The People's Republic of China

Zip Code: 100875

E-mail: [13161615533@163.com](mailto:13161615533@163.com)

Jing Ma and Jianwei Zhang are joint first authors and contributed equally to this work.

**(3) Co-authors**

Hua Li

Anzhen Community Health Service Center, Chaoyang District , Beijing , China

E-mail: [splawyer88@sina.com](mailto:splawyer88@sina.com)

Lianshan Zhao

Beijing Shuili Hospital, Beijing , China

E-mail: [zhaols1006@sina.com](mailto:zhaols1006@sina.com)

Aiying Guo

1  
2  
3  
4 Anzhen Community Health Service Center, Chaoyang District , Beijing , China

5  
6 E-mail: [229127866@qq.com](mailto:229127866@qq.com)  
7

8 Zaihao Chen

9 College of Wushu, Beijing Sports University, Beijing, 100084, China.

10 E-mail: [2455374274@qq.com](mailto:2455374274@qq.com)  
11  
12

13 Wen Yuan

14 College of Wushu, Beijing Sports University, Beijing, 100084, China.

15 E-mail: [2788127942@qq.com](mailto:2788127942@qq.com)  
16  
17

18 Tianming Gao

19 College of P.E. and Sports, Beijing Normal University, Beijing, 100875, China.

20 E-mail: [1714130371@qq.com](mailto:1714130371@qq.com)  
21  
22

23 Yameng Li

24 College of P.E. and Sports, Beijing Normal University, Beijing, 100875, China.

25 E-mail: [1439702398@qq.com](mailto:1439702398@qq.com)  
26  
27

28 Cuihan Li , Dr

29 College of Wushu, Beijing Sports University, Beijing, 100084, China.

30 E-mail: [569630979@qq.com](mailto:569630979@qq.com)  
31  
32

33 Hongwei Wang

34 College of P.E. and Sports, Beijing Normal University, Beijing, 100875, China.

35 E-mail: [13919437131@163.com](mailto:13919437131@163.com)  
36  
37

38 Bo Song

39 College of P.E. and Sports, Beijing Normal University, Beijing, 100875, China.

40 E-mail: [645353652@qq.com](mailto:645353652@qq.com)  
41  
42

43 Yulong Lu

44 College of P.E. and Sports, Beijing Normal University, Beijing, 100875, China.

45 E-mail: [34910476@qq.com](mailto:34910476@qq.com)  
46  
47

48 Meize Cui

49 College of P.E. and Sports, Beijing Normal University, Beijing, 100875, China.

50 E-mail: [2217554936@qq.com](mailto:2217554936@qq.com)  
51  
52

53 Qiuyang Wei

54 College of P.E. and Sports, Beijing Normal University, Beijing, 100875, China.

55 E-mail: [291610192@qq.com](mailto:291610192@qq.com)  
56  
57  
58  
59  
60

---

**(4) Corresponding author**

Shaojun Lyu, Ph D  
Beijing Normal University  
College of Physical Education and Sports  
No.19 Xijiekou wai street Haidian district, Beijing  
The People's Republic of China  
Zip Code: 100875  
E-mail: [113121860699@163.com](mailto:113121860699@163.com)

Tel : +86 13121860699

**Co -Corresponding author**

Hengchan Yin prof  
Beijing Normal University  
College of Physical Education and Sports  
No.19 Xijiekou wai street Haidian district, Beijing  
The People's Republic of China  
Zip Code: 100875  
E-mail: [yinhengchan@bnu.edu.cn](mailto:yinhengchan@bnu.edu.cn)

Shaojun Lyu and Hengchan Yin are co-corresponding author.

**(5) Keywords**

Coronary heart disease; Complementary medicine; Healthcare; Cardiac rehabilitation;  
Clinical trials

**(6) Word count:** 5112 words

---

## Safety and Effectiveness of a TaiChi-based Cardiac Rehabilitation Program for Chronic Coronary Syndrom Patients: Study Protocol for a Randomized Controlled Trial

### ABSTRACT

**Introduction:** Preliminary evidence from clinical observations suggests that Tai Chi exercise may offer potential benefits for patients with chronic coronary syndrom(CCS). However, the advantages for CCS patients to practice Tai Chi exercise as rehabilitation have not been rigorously tested and there is a lack of consensus on its benefits. This study aims to develop an innovative Tai Chi Cardiac Rehabilitation Program (TCCRP) for CCS patients and to assess the efficacy, safety and acceptability of the program.

**Methods and analysis:** We propose to conduct a multicenter randomized-controlled clinical trial comprising of 150 participants with CCS. The patients will be randomly assigned in a 1:1 ratio into two groups. The intervention group will participate in a supervised TCCRP held 3 times a week for 3 months. The control group will receive supervised conventional exercise rehabilitation (CER) held 3 times a week for 3 months. The primary and secondary outcomes will be assessed at baseline, 1 month, 3 months after intervention and after an additional 3 months follow-up period. Primary outcome measures will include a score of 36-Item Short Form Survey and Chinese Perceived Stress Scale. The secondary outcome measures will include body composition, cardiopulmonary exercise test, respiratory muscle function, locomotor skills, echocardiogram, New York Heart Association classification, heart rate recovery time and laboratory examination. Other measures also include Seattle Angina Scale, Pittsburgh Sleep Quality Index, Patient Health Questionnaire-9, Generalized Anxiety Disorder-7 and Berg Balance Scale. All adverse events will be recorded and analyzed.

**Ethics and dissemination:** This study conforms to the principles of the Declaration of Helsinki and relevant ethical guidelines. Ethical approval has been obtained from the Ethics Committee of Chinese PLA General Hospital (approval number: S2019-060-02). Findings from this study will be published and presented at conferences for widespread dissemination of the results.

---

**Trial registration number:** ClinicalTrials.gov identifier: NCT03936504

**Strengths and limitations of this study:**

- The proposed research study is unique and the first study about a Bafa Wubu of Tai Chi which is a new Tai Chi school.
- TCCRP in this study was specifically designed for patients with CCS.
- This is the first time for Tai Chi study to develop a comparative training system to match the conventional exercise.
- It is difficult to exclude the effect of other physical activity due to difficulty of monitoring.
- The blinding of participants is unachievable in this trial; however, efforts will be made to ensure that the data is blinded.

**Keywords:** Tai Chi, Coronary heart disease, Chronic coronary syndrom, Safety, Effectiveness, Randomized controlled trial, Exercise rehabilitation.

**INTRODUCTION**

Coronary heart disease (CHD) remains the major cause of morbidity and mortality worldwide. CHD responsible for about one in every seven deaths; and, China Heart Society is predicted to continue until 2030, accounting for 14% of all deaths globally.<sup>1</sup> <sup>2</sup> Despite the use of effective Western medicine treatments, the incidence of CHD continues to rise and is associated with a high mortality rate. Cardiac rehabilitation (CR), especially exercise training is proven to significantly alleviate the cardiac symptoms, preserve the heart function, and improve the clinical outcomes. Therefore cardiac rehabilitation is recommended by many guidelines of different countries.<sup>3-9</sup> However, latest study demonstrated only 24.4% CR-eligible Medicare beneficiaries participated in CR and marked disparities were observed.<sup>10</sup> Besides limitation of medical resource, poor compliance of patients remains main reason. An effective and attractive CR training system is urgently needed.

These years the integration of Traditional Chinese medicine (TCM) with Western

1  
2  
3  
4 medicine to treat CHD has made great progress. As an effective complementary  
5 therapy, TCM has been demonstrated to improve the prognosis of CHD patients.<sup>11</sup> Tai  
6 Chi is an important element of TCM which combines the meridians and collateral  
7 theory, Yin-Yang theory and Five-element theory. Tai Chi exercise contains three  
8 core elements, namely “body”, “breath” and “mind”, as pronounced in Chinese as  
9 “Xing”, “Qi”, “Yi” respectively. The spirits of Tai Chi are summarized to “building  
10 the body”, “conveying the breath” and “using the mind”. Previous studies have shown  
11 that regular Tai Chi exercise was beneficial in improving psychological and  
12 physiological outcomes among CHD patients.<sup>12-15</sup> Study by Professor  
13 Salmorirago-Bloethcer have showed patients receiving Tai Chi exercise exhibited  
14 much better compliance than those receiving conventional exercise.<sup>12</sup>

15  
16  
17  
18  
19  
20  
21  
22  
23  
24  
25 There are many schools in Tai Chi such as the Yang-style, Wu-style, Chen-style,  
26 Wu-style and Sun-style, wherein each style takes a different approach in terms of the  
27 movements and forms. Furthermore, as Tai Chi exercise comprises many assorted  
28 movements that can be also complex to perform, it is difficult to popularize and  
29 simplify the exercise, especially in elderly patients and patients with chronic diseases.

30  
31  
32  
33  
34  
35 Based on prior insights of the Tai Chi movements obtained from our studies and  
36 other work,<sup>16 17</sup> our research team developed an innovative Tai Chi Cardiac  
37 Rehabilitation Program (TCCRP) specifically for CHD patients. However, as the  
38 value of TCCRP has not yet to be clinically proven, a clinical trial is required to  
39 validate the benefits of adopting this exercise for CHD patients.

40  
41  
42  
43  
44  
45  
46  
47  
48  
49  
50  
51  
52  
53  
54  
55  
56  
57  
58  
59  
60  
CHD can be categorized as either acute coronary syndrome (ACS) or chronic  
coronary syndrome (CCS) due to pathophysiological features and clinical prognosis  
because it is dynamic process of atherosclerotic plaque accumulation and functional  
alterations of coronary circulation<sup>18</sup>. Between the two process, most CHD patients  
stay in the CCS state. Latest studies revealed patients with CCS benefit a lot from  
cardiac rehabilitation programs characterized by life style therapy<sup>18</sup>. So we chose CCS  
patients as our subjects. This study aims to assess the efficacy, safety, and  
acceptability of TCCRP for CCS patients.



The primary hypothesis is that TCCRP (the intervention group) will improve the life quality and reduce the stress when compared against conventional exercise rehabilitation (CER, the control group). Secondary objectives are to evaluate the effects of the TCCRP on body composition, cardiopulmonary exercise test, respiratory muscle function, locomotor skills, echocardiogram, New York Heart Association (NYHA) classification, heart rate recovery time and laboratory examination. Other indicators measured will include Seattle Angina Scale (SAQ), Pittsburgh Sleep Quality Index (PSQI), Patient Health Questionnaire-9 (PHQ-9), Generalized Anxiety Disorder-7 (GAD-7), Berg Balance Scale (BBS) and major adverse cardiac events. Additional objectives to be explored will include: (1) the influence of potential factors on the adherence to the TCCRP; (2) the safety of the TCCRP and (3) individual experiences and acceptability following the TCCRP.

## **METHODS/DESIGN**

### **Study design**

This is a prospective, multicenter, randomized-controlled clinical trial comparing a TCCRP with CER with an allocation ratio of 1:1. The study period lasts for 6 months including a 3-month supervised intervention and a 3-month follow-up with the primary outcomes measured at baseline, 1 month, 3 months and 6 months. Secondary outcomes will be measured at baseline and after a 3-month intervention period. A brief flowchart of the entire study is shown in Figure 1 and the schedule of events is provided in Table 1. The study protocol is reported according to Standard Protocol Items: Recommendations for Intervention Trials 2013 (SPIRIT). A SPIRIT Checklist is provided in the online supplementary additional file<sup>1</sup>. The study protocol was submitted to the Ethics Committee of Chinese PLA General Hospital on 26 January 2019. After 2 revisions, and final version 3 of the protocol was approved on 2 June 2019 (approval number: S2019-060-02). This study is registered on ClinicalTrials.gov (NCT03936504).

---

### Sample size calculation

Sample size calculation will be based on the co-primary outcomes of the RCT. The SF-36 Health Survey (SF-36) and Chinese Perceived Stress Scale (CPSS) are being set as the co-primary outcome and used for sample size calculation. Sample size was calculated on the basis of the changes in the SF-36 and CPSS between comparison groups with a significance level of 5% and a two-tailed critical region to ensure the same effect size with 80% power by G\*power V.3.1.9.4 software. The means and their SDs (mean  $\pm$ SD) of the SF-36 and CPSS in the control and intervention group were (64.30 $\pm$ 13.11, 71.79 $\pm$ 16.03)<sup>19</sup> and (42.31 $\pm$ 8.17, 35.15 $\pm$ 6.82)<sup>20</sup>, respectively, at postintervention according to the published literature. Because the sample size calculation of CPSS was less than SF-36, the sample size calculation of SF-36 was selected. This would require 122 participants, inflated to about 150 to account for the loss to follow-up of approximately 20% of participants, with 75 participants being assigned to each group.

### Participants

#### Inclusion criteria

1. Male or non-pregnant women aged from 18 to 80 years;
2. Patients who met the diagnosis criteria of chronic coronary syndrome included in<sup>18</sup>;
3. NYHA class I, II;
4. Participants who understood the purpose of the clinical trial and voluntarily participate with signed informed consent.

#### Exclusion criteria

1. Acute myocardial infarction (AMI) within 2 weeks;
2. Severe aortic stenosis;
3. Hypertrophic cardiomyopathy;
4. Severe valvular heart disease;

5. Malignant tachyarrhythmia;
6. Poor patient compliance and incompleteness of the clinical trial for not satisfying the requirements;
7. Patients with abnormal motor function caused by nervous system deterioration, motor system disease or rheumatic disease;
8. Those who regularly practice Tai Chi during the previous 3 months.

### **Setting and Recruitment**

This multicenter study will be performed at the Beijing Normal University in China. Recruitment and exercise training will occur at the Chinese PLA General Hospital, China, Beijing Shuili Hospital, China, and Anzhen Community Health Service Center, Beijing Chaoyang District, China. One hundred and fifty participants are to be recruited and the recruitment is scheduled to begin in October 2019. Combinations of advertising strategies include flyers within the hospital, advertisements in the print, online media, a major messaging platform (WeChat), clinics and databases.

### **Randomization, allocation concealment and blinding**

After informed consent is signed, all patients will be randomized into either an intervention group receiving a 12-week TCCRCP or a control group receiving CER. The random allocation sequence will be produced by an independent statistician via the PLAN sentences of the statistical software SAS 9.2 in a 1:1 ratio. Next, these assignments will be sent to a study staff member, exclusive to the study coordinator or principal investigator, who will store them into sealed, opaque envelopes with date and signature labels placed over the seals of the envelopes. The randomization envelopes will not be opened unless a participant meets eligibility criteria, completes the informed consent, and undergoes a baseline assessment. Informed consent will be obtained by two blinded research assistants prior to the baseline assessment. Eligible participants will receive the information about this trial and have an informed discussion with two trained research assistants regarding the information provided.

1  
2  
3  
4 The study is conducted in 3 different cycles. Each cycle consists of a TCCRP group  
5 (intervention group) and CER group (control group). Each resulting group consists of  
6 25 patients, equating to a 50 patients participating in each cycle, with a total of 150  
7 patients over the course of the 3 cycles comprising the study. The instructors are  
8 randomly assigned to the 3 cycles.  
9  
10  
11  
12

13 Given the nature of the intervention, it is impossible to blind the patients or any  
14 personnel who are directly involved in conducting the programs. However, all  
15 outcome assessors, laboratory technicians, data managers and statisticians will be kept  
16 blind of the treatment allocations.  
17  
18  
19  
20  
21  
22

### 23 **Patient and Public Involvement**

24 We gave priority to patients as far as possible. Patients are the major factor to be  
25 consider when designing the trial, subject recruitment and data sharing. Since the very  
26 beginning of our study, we have constructed a Patient Public Involvement group.  
27 During the group meeting, Patient Public Involvement group members were informed  
28 about how the study will be conducted. We always take a lot of time to communicate  
29 with patients about how to improve the detail of study to improve their compliance  
30 and they have given some good advice. For example, the patients suggested us to  
31 prepare simple booklet to introduce our study during the outpatients visit and by  
32 internet, also to enlarge the recruitment extent by WeChat and app of our hospital. We  
33 planned to disseminate our research to the participants and the public, such as  
34 publicizing our research in hospital official accounts and various academic lectures.  
35  
36  
37  
38  
39  
40  
41  
42  
43  
44  
45

### 46 **Interventions**

#### 47 **Tai Chi cardiac rehabilitation program (TCCRP) group**

48 Patients in the intervention group will receive TCCRP conducted by a cardiac  
49 rehabilitation team consisting of cardiologists, cardiology nurses, Tai Chi coaches and  
50 research assistants. Procedures and activities of the TCCRP include: (1) Tai Chi  
51 exercise, (2) evaluation of exercise ability, (3) education covering topics related to the  
52 exercise, and (4) a series of adherence strategies.  
53  
54  
55  
56  
57  
58  
59  
60

---

## TCCRP pre-phase: a 2-week exercise before the start of exercise

### 1. TCCRP training

Six professional coaches with at least 10 years of Tai Chi teaching experience will be employed to teach and guide the participants' training. TCCRP will include (a) traditional Tai Chi warm-up exercises, followed by (b) Bafa Wubu of Tai Chi, (c) Tai Chi elastic belt exercise and (d) Tai Chi cool-down exercises.

(a) Tai Chi warm-up exercises (10 minutes) will include traditional breathing methods (full-body breathing), weight shifting, arm-swinging etc. These exercises will help release tension in the physical body, incorporate mindfulness and imagery into movement, increase breathing awareness and promote overall relaxation of the body and mind.

(b) The core Tai Chi movements (30 minutes) will be adapted from the Bafa Wubu of Tai Chi (also known as "eight methods and five footwork", Fig. 2), which include introductory routines to Tai Chi characterized with simple structures and rich connotations performed repetitively. Technically speaking, the "Bafa" consists eight hand techniques, namely "Peng (warding off), Lu (rolling back), Ji (pressing), An (pushing), Cai (pulling down), Lie (splitting), Zhou (elbowing) and Kao (shouldering)"; while the "Wubu" consists five footwork, namely "Jin (advancement), Tui (retreat), Gu (shifting left), Pan (shifting right) and Ding (central equilibrium).

(c) Tai Chi combined with light-weight resistance band exercises (10 minutes) will include Tai Chi "Open and Close" movement, Tai Chi Spinning movement and Tai Chi Twining movement.

(d) Tai Chi cool-down exercises (10 minutes) will include various relaxation methods, such as regulating breath, regulating body and regulating mind.

Patients are required to practice the TCCRP until they master it. Mastery will be determined by the professional coaches. The mastery of Tai Chi was assessed and quantified due to the following 6 factors: the body shape should keep straight and upright; the gravity center shift is right; the action moves in an order; moving speed has a sense of rhythm; action and movement contains wring and screwing; every set

1  
2  
3  
4 consumes similar time. We have constructed a testing committee including 10 Tai Chi  
5 experts who had discussed together and summerized a scoring criteria concerning the  
6 above 6 dimensions. Six professional coaches with more than 10 years of Tai Chi  
7 teaching experiences were trained about the scoring system and then coached the  
8 subjects. At the end of learning stage, 3 of coaches were chosen randomly to work as  
9 the examiner. The professional coaches scored on a percentile basis according to the  
10 above 6 dimensions. Only the participants who gained an average score higher than  
11 80 would be certificated to be qualified and move on the to the trial step.  
12  
13  
14  
15  
16  
17  
18

- 19 2. Evaluation of exercise ability (week – 1 to week 0):  
20  
21 (a) Evaluation is conducted by cardiologists and physiotherapists;  
22  
23 (b) Evaluation is based on reviewing medical history, cardiopulmonary exercise  
24 test results and the performance of Tai Chi (heart rate and oxygen consumption  
25 will be recorded while performing Tai Chi);  
26  
27 (c) Evaluation results will guide the goal-setting process during consultation;  
28  
29 3. Education covering topics related to exercise:  
30  
31 (a) Basic knowledge of chronic heart disease,  
32  
33 (b) Basic knowledge of exercise-based cardiac rehabilitation.  
34  
35  
36  
37

### 38 **TCCRP exercise phase: a 12-week intervention period**

39  
40 Participants will perform the TCCRP 3 times a week for 12 weeks. Each training  
41 session is 60 minutes and includes Tai Chi warm-up exercises (10 minutes), Bafa  
42 Wubu of Tai Chi (30 minutes), Tai Chi combined with light-weight resistance band  
43 exercises (10 minutes) and Tai Chi cool-down exercises (10 minutes). All participants  
44 will be encouraged to practice Tai Chi according to an instructional video until the  
45 end of the 12-week period.  
46  
47  
48  
49  
50

51  
52  
53 Researchers will record the subjects' heart rate and blood pressure before and after  
54 training. During the training, the exercise intensity will be assessed by the Borg  
55 Rating of Perceived Exertion Scale (RPE Scale),<sup>21</sup> which is a frequently used  
56  
57  
58  
59  
60

quantitative measure of perceived exertion during exercise.

### **TCCRP follow-up phase: a 12-week follow-up period**

After the 12-week TCCRP intervention, there will be a 12-week follow-up period that excludes any active rehabilitation. During the follow-up period, the participants will be asked to fill out forms to record the times and durations of their Tai Chi exercise or other physical activities and any incidence of a major adverse cardiac event. The forms will be returned to the researchers for follow-up each week by email or WeChat.

### **CER group (Control group)**

Participants in the control group will receive a CER 3 times a week for 12 weeks. Each training session lasts for 60 minutes, including ordinary warm-up exercises (10 minutes), aerobic activity (30 minutes), resistive exercise (10 minutes) and cool-down exercises (10 minutes). Each training session includes: (1) an active warm-up including arm-swinging, gentle stretches of the neck, shoulders, spine, arms and legs; (2) an aerobic activity comprising primarily cycle ergometer exercise; (3) resistive exercise mainly including resistance band exercises; and (4) a cool-down session involving active and static stretching exercises with primary body movements.

The CER program is consistent with the current recommended guidelines of moderate intensity exercises (50 to 80% Heart Rate Reserve (HRR); Rated Perceived Exertion 11–13) for CHD patients. Our program is individually tailored to each participant alongside close supervision. The program will be introduced and increased in duration and intensity gradually to achieve the target of moderate-intensity exercise.

### **Concomitant treatment**

Participants in both groups will continue routine medications, such as aspirin, metoprolol, anti-platelet and anti-coagulant drugs or beta-adrenergic blockers,

1  
2  
3  
4 according to patients' respective conditions and will maintain their usual treatment  
5 visits throughout the study. All procedures and medication prescriptions will be  
6 determined by physicians following the clinical guidelines.<sup>22 23</sup> The specific date and  
7 reasons of any medical therapy changes will be recorded in the case report form  
8 (CRF).  
9  
10  
11  
12

### 13 14 15 **Outcome measures**

16 All outcome measures will be collected by 3 research assistants at 2 weeks (baseline),  
17 1 month, 3 months (at the end of intervention) and 6 months (at the 3-month  
18 follow-up). Demographic information collected will include age, gender, ethnicity,  
19 marital status, education level, accommodation type and postal address. Clinical  
20 information will also be obtained from the patients' clinical records by a member of  
21 their hospital research team. All data collected from the assistants and therapists will  
22 be stored in a dedicated computer for the study and will be kept in a secure and  
23 lock-protected location.  
24  
25  
26  
27  
28  
29  
30  
31  
32

### 33 34 35 **Primary outcome measures**

- 36 1. The SF-36 Health Survey (SF-36) is a multi-purpose, short-form health survey  
37 with only 36 questions.<sup>24</sup> SF-36 items cover eight domains: physical functioning,  
38 role limitations due to physical health problems, body pain, general health,  
39 vitality, social functioning, role limitations due to emotional problems and mental  
40 health. Higher scores indicate higher levels of health. SF-36 will be evaluated at  
41 baseline, 1 month, 3 months (at the end of intervention) and 6 months (at the  
42 3-month follow-up).  
43  
44
- 45 2. Chinese Perceived Stress Scale (CPSS) is a self-rated questionnaire that assesses  
46 perceived stress.<sup>25</sup> CPSS consists 14 items that are divided into two categories:  
47 sense of tension and loss of control. Higher scores indicate higher levels of stress.  
48 CPSS will be evaluated at baseline, 1 month, 3 months (at the end of  
49 intervention) and 6 months (at the 3-month follow-up).  
50  
51  
52  
53  
54  
55  
56  
57  
58  
59  
60



---

## Secondary outcome measures

1. Body composition measurements will include fat mass, body fat (percentage), fat-free mass and lean body mass. These measurements will be taken by bioelectrical impedance analysis using an Inbody 770 (Biospace Co) at baseline, 1 month, 3 months (at the end of intervention) and 6 months (at the 3-month follow-up).
2. Cardiopulmonary exercise test (CPET) is an objective method being increasingly used in a wide spectrum of clinical practice for assessing the functional capacity of CHD patients. Indexes include changes in  $VO_2$  peak and VAT and  $VE/VCO_2$  slope in the cardiopulmonary exercise test (CPET) at the end of the 3-month intervention.
3. Respiratory muscle function will be measured by POWER breath K-5. Indexes include changes in S-Index, Peak PIF of inspiratory velocity and power at the end of the 3-month intervention.
4. Locomotor skills includes handgrip strength, balance and flexibility. Handgrip strength, which is used to determine the maximum isometric strength of the hand and forearm muscles, will be measured using the handgrip strength dynamometer produced by CAMRY (product type EH101). The best result from repeated tests of each hand will be recorded. The balance will be evaluated by using the time duration until losing balance. We respectively investigated the time duration of standing on one foot with eyes closed, standing on one foot with eyes open, strengthening Romberg ' s test<sup>26</sup>. The participants were tested three times to record their time until they lost their balance. Finally, the best of the three was selected. Time difference were calculated as the time duration after treatment minus that before treatment. Flexibility will be measured by seated forward flexion test. Locomotor skills will be evaluated at baseline and at the end of the 3-month intervention.
5. An echocardiogram comprising LVED Vi and LVEF using echocardiography

1  
2  
3  
4 will be assessed at baseline and at the end of the 3-month intervention. NYHA  
5 classification will also be evaluated at baseline and at the end of the 3-month  
6 intervention.  
7  
8

- 9  
10 6. Heart rate recovery time will be measured. Heart rate recovery time will record  
11 heart rate 1 to 6 minutes after Tai Chi exercise, power cycling and resistance  
12 exercise.  
13  
14  
15 7. A laboratory examination will be performed that includes glycolipid metabolism,  
16 inflammatory factor level, immunologic function and oxidative stress index. The  
17 laboratory examination will be evaluated at baseline and at the end of the  
18 3-month intervention.  
19  
20  
21  
22  
23 8. The Berg Balance Scale (BBS) is a widely used clinical test of a person's static  
24 and dynamic balance abilities<sup>27</sup>, and comprises of a set of 14 simple balance  
25 related tasks, ranging from standing up from a sitting position to standing on one  
26 foot. Total score ranges from 0 to 56, with 0 to 20 corresponding to a high fall  
27 risk, 21 to 40 a medium fall risk and 41 to 56 a low fall risk. The Berg Balance  
28 Scale will be evaluated at baseline and at the end of the 3-month intervention.  
29  
30  
31  
32  
33 9. The Pittsburgh Sleep Quality Index (PSQI) is a self-rated questionnaire that  
34 assesses sleep quality and disturbances.<sup>28</sup> It contains 19 self-answered questions  
35 for the subject and 5 peer-answered questions for the bed partner or a roommate  
36 (if one is available). The scores from seven categories are added to calculate the  
37 index, ranging from 0 to 21. A score of zero indicates no disturbance in sleep or  
38 good sleep quality, whereas higher scores indicate poorer sleep quality. The PSQI  
39 will be evaluated at baseline and at the end of the 3-month intervention.  
40  
41  
42  
43  
44  
45  
46  
47  
48 10. Patient Health Questionnaire-9 (PHQ-9) and Generalized Anxiety  
49 Disorder-7(GAD-7) are validated self-answered questionnaires that assess levels  
50 of depression and anxiety. Higher scores reflect greater levels of anxiety and  
51 depression. PHQ-9 and GAD-7 will be evaluated at baseline and at the end of the  
52 3-month intervention.  
53  
54  
55  
56  
57  
58 11. The Seattle Angina Score (SAQ) will be used to determine the total number of 9  
59  
60

1  
2  
3  
4 problems and the 5 aspects of CAD, including the degree of physical activity, the  
5 stability and frequency of angina, the degree of satisfaction of the treatment, and  
6 the perception of the disease. The higher the score, the better the quality of life  
7 and body function. SAQ will be measured at baseline and at the end of the  
8 3-month intervention.  
9

- 10  
11  
12  
13 12. A record will be made of any side effects and possible adverse reactions arising  
14 from the intervention.  
15  
16

### 17 18 19 **Safety measurements**

20  
21 All study participants are monitored weekly during the study intervention for the  
22 occurrence of adverse events defined by any undesirable experience. All adverse  
23 events that occur during the study will be recorded on the Adverse Event Case Report  
24 Form and will be evaluated for relevance to the intervention. All adverse events will  
25 also be reported to the Human Research Committee promptly in accordance with  
26 guidelines.  
27  
28

29  
30  
31  
32  
33 Only patients who are eligible and capable of completing the test will undergo a  
34 Cardiopulmonary Exercise Test (CPET). For enrolled patients meeting the  
35 rehabilitation training standards, they will be stratified according to the degree of  
36 motion risk and appropriate exercise intensity and time will be adjusted based on their  
37 risk stratification. Before the cardiac rehabilitation exercise, researchers will educate  
38 patients about the CHD rehabilitation exercises, including training contraindications  
39 and exercise advisories regarding the respective CER and TCCRP exercises.  
40  
41 Moreover, the cardiac rehabilitation Center of Chinese PLA General Hospital, Beijing  
42 Shuili Hospital and Anzhen Community Health Service Center are equipped with a  
43 comprehensive set of rescue equipment. A thorough contingency plan and rescue  
44 procedure for cardiovascular events has also been formulated prior to the  
45 commencement of the research. Should an adverse event occur during the exercise,  
46 the researchers will immediately initiate the contingency plan to circumvent the  
47 occurrence of any fatal outcomes.  
48  
49  
50  
51  
52  
53  
54  
55  
56  
57  
58  
59  
60

---

## Data management and monitoring

Beijing Normal University will be responsible for managing the data and performing statistical analyses. The research assistants will be responsible for checking the integrity of the completed CRF and for timely entry of the collected data into the EpiData Manager, a free data management software. The project manager will be responsible for initial data cleaning, identifying, coding and converting the data into the proper format for analysis. All investigators involved in data management and analysis will be blinded to treatment allocation. Regular monitoring by the sponsor of China National Center for Biotechnology Development will be performed according to ICH GCP. China National Center for Biotechnology Development will be responsible for monitoring the research progress and meet every three months. It will oversee all aspects of the trial delivery including protocol amendments, recruitment of participants, monitoring intervention fidelity, management of timelines and milestones, publication and dissemination plans. Each amendment of the protocol conforms to the GCP principles and is submitted to the Ethics Committee for approval.

## Statistical analysis

Continuous variables will be described as mean  $\pm$  standard deviation (SD) for normal distributions or median for non-normal distributions, categorical variables will be described as frequency. Baseline data mainly describe the clinical characteristic and features of the subjects. We also tested the equalization of the two groups of variables. Continuous variables will be described as a two-sample Student's t-test for normal distributions or Wilcoxon test for non-normal distributions. Categorical variables will be described as the chi-square test. The group difference between intervention and control group at each time point (4 and 12 weeks after intervention or 12-week follow-up period) will be analysed using Student's t-test or Mann-Whitney U-test. A two-way analysis of variance with repeated measures will be used to determine the effects of time and group on our dependent variables. A Bonferroni-adjusted post hoc

analysis will be conducted when time-group interaction was detected. The analysis of primary or secondary outcomes will be based on an intention to treat (ITT) principle, and participants who either drop out from the study or fail to adhere to the protocol will have their last known data carried forward. The missing data will be imputed using a multiple imputation method. All data will be analyzed with SPSS 21.0 (IBM, Chicago, IL, USA) software packages. Statistical significance is defined as a two-sided  $P$  value  $< 0.05$ .

### **Adherence**

To motivate participants' adherence, the research group will use several strategies (e.g. ancillary and post-trial care) to ensure the participants stays for the entire study period. (1) The participants will receive 36 cardiac rehabilitation treatments free of charge, for a total price of about 10,000 RMB; (2) the participants will be entitled specialist outpatient priority plus; (3) participants will be given three free face-to-face health education lectures by specialists; In addition, participant who complete the protocol successfully will be rewarded with Wushu training clothing no matter which group they belongs to. During the 3-month treatment period, participants will be asked to practice strictly according to the training program and will not be allowed to take part in any new or additional exercise programs. Throughout the 3-month intervention period, the researchers will track the number of missed sessions for each participant during the intervention period. Participants' attendance will be monitored during each in-person session by staff-completed attendance forms and class sign-in sheets. The percentage of compliance will be documented on the case report form. The rate of patient compliance = (total planned number of times – number of absence) / total number of times  $\times 100\%$ . A compliance rate of 80% or greater will be considered as good, whereas a compliance rate of less than 80% is considered as poor. An attendance of less than 20% will be considered as a dropout from the study.

### **Ethics and dissemination**

1  
2  
3  
4 This study conforms to the principles of the Declaration of Helsinki and relevant  
5 ethical guidelines. Ethical approval and informed consent form have been obtained  
6 from the Ethics Committee of Chinese PLA General Hospital (approval number:  
7 S2019-060-02). The study background and main objective as well as potential  
8 benefits and risks will be fully explained to the participants and their families.  
9 Findings from this study will be published and presented at conferences for  
10 widespread dissemination of the results.  
11  
12  
13  
14  
15  
16  
17  
18

## 19 **DISCUSSION**

20  
21 The development of an ideal and effective cardiac rehabilitation program is still being  
22 explored and current cardiac rehabilitation mainly consists of contemporary  
23 conventional exercises. In fact, current cardiac rehabilitation programs have been  
24 reported to be underdeveloped and limited, reflected by a poor level of involvement  
25 with less than 30% of patients participating in the existing offerings.<sup>29</sup> As such, there  
26 is an unmet need for reforms and the provision of alternative cardiac rehabilitation  
27 programs to encourage the growth of cardiac rehabilitation. The exploration of an  
28 ideal cardiac rehabilitation exercise that is most beneficial for CCS patients should be  
29 determined.  
30  
31  
32  
33  
34  
35  
36  
37

38 This trial is the first one to compare the safety, feasibility and benefits of TCCRP  
39 and CER in CCS patients. There are several strengths of our trial: Firstly, the  
40 proposed research study is unique and the first study about a Bafa Wubu of Tai Chi  
41 which is a new Tai Chi school. Secondly, TCCRP in this study was specifically  
42 designed for patients with CCS. Finally, this is the first time for Tai Chi study to  
43 develop a comparative training system to match the conventional exercise. Our study  
44 will supply scientific evidence for the promotion of Bafa Wubu of Tai Chi at home  
45 and abroad.  
46  
47  
48  
49  
50  
51  
52  
53

54 TCCRP has some features which make it more suitable for CCS patients. Firstly,  
55 the intensity of TCCRP is low, and it is much safer for patients with CCS. Secondly,  
56 TCCRP is much easier to be learned and possesses a simple structure of movements, a  
57  
58  
59  
60

1  
2  
3  
4 reasonable number of postures, and fewer practice environment limitations. Thirdly,  
5 TCCRP is not limited by location and easy to be carried out. Finally, TCCRP doesn't  
6 need money or any equipment. To sum up, compared with conventional exercise  
7 rehabilitation (CER), TCCRP is more suitable for CCS patients.  
8  
9

10  
11 Compared with conventional exercise styles (e.g. aerobic, resistance, and  
12 extensibility exercise), Tai Chi typically involves a mind–body integration practice  
13 that combines the coordination of slow movements with mental focus, deep breathing,  
14 and relaxation for promoting both physical and mental well-being.<sup>30-32</sup> Previous  
15 studies have shown that regular Tai Chi exercise is beneficial in improving  
16 psychological and physiological outcomes among the elderly and various clinical  
17 populations (e.g. Parkinson's disease, diabetes mellitus, hypertension, chronic  
18 obstructive pulmonary disease (COPD) and psychological illness).<sup>33-36</sup> As a typical  
19 mind–body exercise which incorporates the characteristics of Traditional Chinese  
20 Medicine, Tai Chi may be considered to be an effective exercise to promote health in  
21 a diverse range of populations (e.g. healthy population, patients with chronic diseases,  
22 youths, middle-aged or elderly adults).<sup>37 38</sup>  
23  
24  
25  
26  
27  
28  
29  
30  
31  
32  
33  
34

35 Compared with other Tai Chi schools, TCCRP has distinct advantages for CCS  
36 patients. TCCRP utilized Bafa Wubu of Tai Chi, namely, introductory routines to Tai  
37 Chi characterized by simple structures. Of the many styles of Tai Chi, however, it is  
38 hard to further popularize and generalize, due to its numerous movements and  
39 complexity, especially among patients with CCS. By upholding scientific,  
40 standardized and simplified principles, the Bafa Wubu of Tai Chi is systematically  
41 refined and sorted out on the basis of the other forms of Tai Chi, and the two exercise  
42 forms of “standing” and “marching”, thus forming a set of Tai Chi routines for  
43 popularization characterized by culture, fitness and simplicity. Compared with the  
44 others, Bafa Wubu of Tai Chi is safer and much easier to be mastered for patients  
45 with CCS.  
46  
47  
48  
49  
50  
51  
52  
53  
54  
55

56 It should be acknowledged that this study has several limitations. It is difficult to  
57 monitor any additional physical activity of participants during the study duration.  
58  
59  
60



1  
2  
3  
4 Although all participants will be required to record their daily physical activity or  
5 exercise information with a pedometer, this is not sufficiently accurate to track their  
6 daily activity intensity. Furthermore, due to the nature of the exercise interventions  
7 (Tai Chi versus CER), the blinding of participants is unachievable in this trial.  
8  
9 However, every effort will be made to ensure that the outcome assessors, data  
10 managers and statisticians participating in this study will be kept blind of the  
11 treatment allocations.  
12  
13  
14  
15  
16

17 In conclusion, this study aims to assess the efficacy, safety and acceptability of an  
18 innovative TCCRP for CCS patients. The finding will be vital to help establish an  
19 optimal cardiac rehabilitation program for treating CCS patients.  
20  
21  
22

## 23 24 25 **TRIAL STATUS**

26  
27 This trial is currently in the recruitment phase. Estimated completion of the trial is  
28 expected to be completed by December 2020.  
29  
30  
31

## 32 33 **Additional files**

## 34 35 **Abbreviations**

36  
37 CHD: coronary heart disease; CCS: chronic coronary syndrome; ACS: acute coronary  
38 syndromes; TCCRP: Tai Chi cardiac rehabilitation program; TCM: Traditional  
39 Chinese Medicine; CER: conventional exercise rehabilitation.  
40  
41  
42  
43

## 44 45 **Author affiliations**

46  
47 1 College of Physical Education and Sports, Beijing Normal University, Beijing,  
48 China  
49

50  
51 2 Department of Cardiovascular Medicine, Military General Hospital of Beijing PLA,  
52 Beijing, China  
53

54  
55 3 Anzhen Community Health Service Center, Chaoyang District, Beijing, China

56  
57 4 Department of Cardiovascular Medicine, Beijing Shuili Hospital, Beijing, China

58  
59 5 College of Wushu, Beijing Sports University, Beijing, China  
60



---

### **Authors' contributions**

LSJ, MJ, and YHC conceived and designed the study protocol. The individual interviews were conducted by LSJ, MJ, LH, ZLS, and GAY. ZJW and MJ performed the translation and analysed the data. LSJ, ZJW, YW, CZH, WQY, CMZ, LYM, LYL, GTM, LCH, SB and WHW guided and supervised the Tai Chi training. ZJW and MJ contributed to writing and reading the manuscript. All authors approved the final manuscript.

### **Acknowledgements**

The authors most gratefully thank the physicians and nurses of the Chinese PLA General Hospital, Beijing Shuili Hospital and Anzhen Community Health Service Center, Chaoyang District, Beijing. Thank you for effort working as numbers of Patient Public Involvement group, such as Weiling Guo, Wu Feng, Haibin Wang, Yong Ma and Jijun Li.

### **Funding**

This work is financially supported by National Key R&D Program of China(2018YFC2000600) and Finance Department of the State Administration of Traditional Chinese Medicine (GZY-GCS-2018-011) and the Wushu Research Institute of the General Administration of Sport of China (WSH2018A004).

### **Competing interests**

None declared.

### **Patient consent for publication**

Not required.

### **Provenance and peer review**

Not commissioned; externally peer reviewed.

### Data sharing statement

The data capture system and web servers will be provided by the data management center of Beijing Normal University (<http://cas.bnu.edu.cn/cas/login>) and the data management belongs to the Wushu and National Traditional Sports Culture Promotion Research Center of Beijing Normal University. The results of the review will be disseminated through peer-reviewed publications.

### Open Access

This is an open access article distributed in accordance with the Creative Commons Attribution Non Commercial (CC BY-NC 4.0) license, which permits others to distribute, remix, adapt, build upon this work non-commercially, and license their derivative works on different terms, provided the original work is properly cited and the use is non-commercial. See: <http://creativecommons.org/licenses/by-nc/4.0/>

© Article author(s) (or their employer(s) unless otherwise stated in the text of the article) 2019. All rights reserved. No commercial use is permitted unless otherwise expressly granted.

### REFERENCES

1. Lozano R, Naghavi M, Foreman K, et al., Global and regional mortality from 235 causes of death for 20 age groups in 1990 and 2010: a systematic analysis for the Global Burden of Disease Study 2010. *Lancet* 2012; 380:2095-128.
2. Mirzaei M, Truswell AS, Taylor R, Leeder SR. Coronary heart disease epidemics: not all the same. *Heart* 2009; 95:740-6.
3. Taylor RS, Brown A, Ebrahim S, et al. Exercise-based rehabilitation for patients with coronary heart disease: systematic review and meta-analysis of randomized controlled trials. *Am J Med* 2004; 116:682–692.
4. Goel K, Lennon RJ, Tibury RT, et al. Impact of cardiac rehabilitation on mortality and cardiovascular events after percutaneous coronary intervention in the community. *Circulation* 2011;123:2344-52.
5. Suaya JA, Stason WB, Ades PA, et al. Cardiac rehabilitation and survival in older coronary patients. *J Am Coll Cardiol* 2009; 54:25–33
6. Taylor RS, Brown A, Ebrahim S, et al. Exercise-based rehabilitation for patients with coronary heart disease: systematic review and meta-analysis of randomized controlled trials. *Am J Med* 2004;116:682-92.

7. Smith SC Jr, Benjamin EJ, Bonow RO, et al. World Heart Federation and the Preventive Cardiovascular Nurses Association. AHA/ACCF Secondary Prevention and Risk Reduction Therapy for Patients with Coronary and other Atherosclerotic Vascular Disease: 2011 update: a guideline from the American Heart Association and American College of Cardiology Foundation. *Circulation* 2011;124:2458–2473.
8. 2011 ACCF/AHA/SCAI Guideline for Percutaneous Coronary Intervention. A report of the American College of Cardiology Foundation/American Heart Association Task Force on Practice Guidelines and the Society for Cardiovascular Angiography and Interventions. *J Am Coll Cardiol* 2011;58: e44–e122.
9. Piepoli MF, Hoes AW, Agewall S, et al. 2016 European Guidelines on cardiovascular disease prevention in clinical practice: The Sixth Joint Task Force of the European Society of Cardiology and Other Societies on Cardiovascular Disease Prevention in Clinical Practice (constituted by representatives of 10 societies and by invited experts developed with the special contribution of the European Association for Cardiovascular Prevention & Rehabilitation (EACPR). *Eur Heart J* 2016;37:2315–2381.
10. Ritchey MD, Maresh S, McNeely J, et al. Tracking cardiac rehabilitation participation and completion among medicare beneficiaries to inform the efforts of a national initiative. *Circ Cardiovasc Qual Outcomes* 2020. 13(1): e005902.
11. Tao T, He T, Wang X, Liu X. Metabolic profiling analysis of patients with coronary heart disease undergoing Xuefu Zhuyu decoction treatment. *Front Pharmacol* 2019; 10:985.
12. Salmoirago-Blotcher E, Wayne PM, Dunsiger S, et al. Tai Chi is a promising exercise option for patients with coronary heart disease declining cardiac rehabilitation. *J Am Heart Assoc* 2017;6(10).
13. Taylor-Piliae RE, Silva E, Sheremeta SP. Tai Chi as an adjunct physical activity for adults aged 45 years and older enrolled in phase III cardiac rehabilitation. *Eur J Cardiovasc Nurs* 2012; 11:34-43.
14. Sato S, Makita S, Uchida R, Ishihara S, Masuda M. Effect of Tai Chi training on baroreflex sensitivity and heart rate variability in patients with coronary heart disease. *Int Heart J* 2010; 51:238-41.
15. Liu T, Chan A W, Liu Y H, Taylor-Piliae RE. Effects of Tai Chi-based cardiac rehabilitation on aerobic endurance, psychosocial well-being and cardiovascular risk reduction among patients with coronary heart disease: A systematic review and meta-analysis. *Eur J Cardiovasc Nurs* 2018; 17:368-83.
16. Jianwei Zhang, Shaojun Lyu, Ji Wang, et al. A comparative study on the therapeutic effect of Taijiquan on patients with type 2 diabetes mellitus of different genders. *J Beijing Normal University (Nat Sci Ed)* 2019;55:545-50.
17. Shaojun Lyu. *Bafa Wubu of Tai Chi*. Beijing: Beijing Sport University Press. 2018;18-20.
18. Juhani Knuuti, William Wijns, Antti Saraste, et al. 2019 ESC Guidelines for the diagnosis and management of chronic coronary syndromes: The Task Force for the diagnosis and management of chronic coronary syndromes of the European Society of Cardiology (ESC). *Eur Heart J*, 2020;41(3):407-477.
19. Salvetti XM, Oliveira JA, Servantes DM, et al. How much do the benefits cost? Effects of a home-based training programme on cardiovascular fitness, quality of life, programme cost and adherence for patients with coronary disease. *Clin*

- Rehabil, 2008. 22(10-11):987-96.
20. Zhe Xu. Study on the perioperative nursing practice of TCM auricular compression combined with mindfulness meditation training in patients with colorectal cancer. *J Liaoning Univ Tradit Chin Med*,2020.22(02):218-220.
  21. Borg GA. Psychophysical bases of perceived exertion. *Med Sci Sports Exerc* 1982;14:377-81
  22. Fletcher GF, Ades PA, Kligfield P, et al. Exercise standards for testing and training: a scientific statement from the American Heart Association. *Circulation* 2013;128:873-934.
  23. Piepoli MF, Conraads V, Corrà U, et al. Exercise training in heart failure: from theory to practice. A consensus document of the Heart Failure Association and the European Association for Cardiovascular Prevention and Rehabilitation. *Eur J Heart Fail* 2011;13:347-57.
  24. Ware JE Jr, Gandek B. Overview of the SF-36 Health Survey and the International Quality of Life Assessment (IQOLA) Project. *J Clin Epidemiol* 1998;51:903-12.
  25. Yang T. Psychological stress of urban population in social transition. *Chin J Epidemiol* 2002;(6):64-6 .
  26. Yonghao You, Ailing Wen. Human balance assessment method. *Chin J Rehabil Med* 2014;29(11):1099-1104.
  27. Berg K, Wood-Dauphinee S, Williams JI. The balance scale: reliability assessment for elderly residents and patients with an acute stroke. *Scand J Rehab Med* 1995;27:27-36.
  28. Buysse DJ, Reynolds III CF, Monk TH, et al. The Pittsburgh Sleep Quality Index: a new instrument for psychiatric practice and research. *Psychiatry Res* 1989;28:193-213.
  29. Gruyter E D, Ford G and Stavreski B. Economic and social impact of increasing uptake of cardiac rehabilitation services – A Cost Benefit Analysis. *Heart Lung Circ* 2016;25:175-83.
  30. Nery RM, Zanini M, Ferrari JN, et al., Tai Chi Chuan for cardiac rehabilitation in patients with coronary arterial disease. *Arq Bras Cardiol* 2014;102:588-92.
  31. Yang YL, Wang YH, Wang, SR, et al. The effect of Tai Chi on cardiorespiratory fitness for coronary disease rehabilitation: A Systematic Review and Meta-Analysis. *Front Physiol* 2018; 8:1091.
  32. Lan C, Chen SY, Lai JS, et al. The effect of Tai Chi on cardiorespiratory function in patients with coronary artery bypass surgery. *Med Sci Sports Exerc* 1999;31:634-8.
  33. Chang RY, Koo M, Yu ZR, et al. The effect of Tai Chi exercise on autonomic nervous function of patients with coronary artery disease. *J Altern Complement Med* 2008; 14:1107-13.
  34. Gao Q, Leung A, Yang Y, et al. Effects of Tai Chi on balance and fall prevention in Parkinson's disease: a randomized controlled trial. *Clin Rehabil* 2014; 28:748-53.
  35. Xiao CM, Zhuang YC. Effects of Tai Chi ball on balance and physical function in older adults with type 2 diabetes mellitus. *J Am Geriatr Soc* 2015;63):176-7.
  36. Chan AW, Lee A, Lee DT, et al. The sustaining effects of Tai chi Qigong on physiological health for COPD patients: a randomized controlled trial. *Complement Ther Med* 2013; 21:585-94.
  37. Chen WW, Sun WY. Tai chi chuan, an alternative form of exercise for health

- 1  
2  
3 promotion and disease prevention for older adults in the community. *Int Q*  
4 *Community Health Educ* 1996; 16:333-9.  
5  
6 38. Guo JB, Chen BL, Lu YM, et al. Tai Chi for improving cardiopulmonary function  
7 and quality of life in patients with chronic obstructive pulmonary disease: a  
8 systematic review and meta-analysis. *Clin Rehabil* 2016;30:750-64.  
9  
10  
11  
12  
13  
14  
15  
16  
17  
18  
19  
20  
21  
22  
23  
24  
25  
26  
27  
28  
29  
30  
31  
32  
33  
34  
35  
36  
37  
38  
39  
40  
41  
42  
43  
44  
45  
46  
47  
48  
49  
50  
51  
52  
53  
54  
55  
56  
57  
58  
59  
60

For peer review only

**Table 1:** Schedule for data collection; outcome measures per visits

| Items                           | Phase I:<br>Screening | Phase II:<br>Baseline | Phase III:<br>Month 1 | Phase IV:<br>Month 3 | Phase<br>V:<br>Month 6 |
|---------------------------------|-----------------------|-----------------------|-----------------------|----------------------|------------------------|
| Inclusion/exclusion criteria    | √                     |                       |                       |                      |                        |
| Diagnostic index                | √                     |                       |                       |                      |                        |
| Signed informed consent         | √                     |                       |                       |                      |                        |
| Randomization and allocation    | √                     |                       |                       |                      |                        |
| Safety index                    | √                     | √                     | √                     | √                    |                        |
| General clinical information    |                       | √                     |                       | √                    |                        |
| Primary outcomes                |                       | √                     |                       | √                    |                        |
| Secondary outcomes              |                       | √                     |                       | √                    |                        |
| Other indicators                |                       | √                     |                       | √                    |                        |
| Recurrent cardiovascular events |                       |                       | √                     | √                    | √                      |
| Adherence                       |                       |                       | √                     | √                    | √                      |
| Adverse events                  |                       |                       | √                     | √                    |                        |
| Summary at the end of the study |                       |                       |                       |                      | √                      |

**Figure legend**

Figure 1: Flow diagram of study design

SF-36 means the SF-36 Health Survey; CPSS means Chinese Perceived Stress Scale; NYHA means New York Heart Association; SAQ means Seattle Angina Scale; PSQI means Pittsburgh Sleep Quality Index; PHQ-9 means Patient Health Questionnaire-9; GAD-7 means Generalized Anxiety Disorder-7; BBS means Berg Balance Scale.

1  
2  
3 Figure. 2: Exemplary Bafa Wubu of Tai Chi; the pictures have taken the portrait right;  
4 the fogleman is the developer of TCCRCP.  
5

6 The “Bafa” consisted of eight hand techniques were shown in figure 2. Each figure  
7 showed each hand technique, namely “Peng (warding off), Lu (rolling back), Ji  
8 (pressing), An (pushing), Cai (pulling down), Lie (splitting), Zhou (elbowing) and  
9 Kao (shouldering)”.  
10  
11  
12  
13  
14  
15  
16  
17  
18  
19  
20  
21  
22  
23  
24  
25  
26  
27  
28  
29  
30  
31  
32  
33  
34  
35  
36  
37  
38  
39  
40  
41  
42  
43  
44  
45  
46  
47  
48  
49  
50  
51  
52  
53  
54  
55  
56  
57  
58  
59  
60

For peer review only

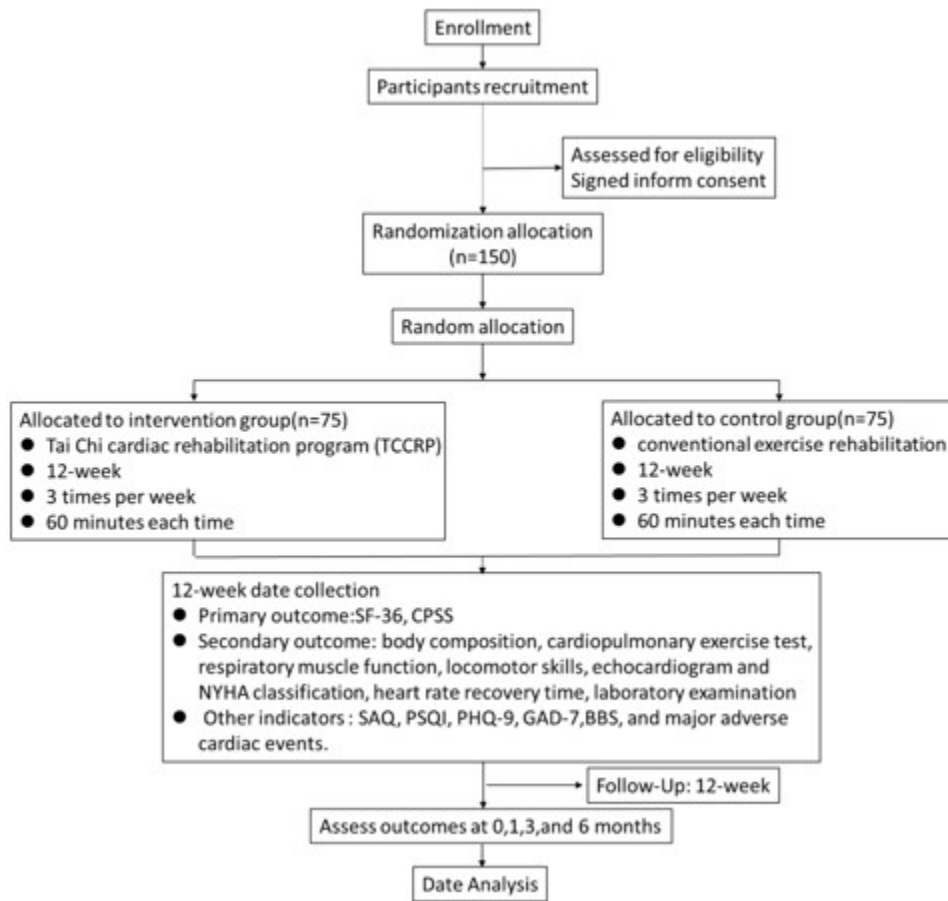

Figure 1: Flow diagram of study design

126x119mm (96 x 96 DPI)



1  
2  
3  
4  
5  
6  
7  
8  
9  
10  
11  
12  
13  
14  
15  
16  
17  
18  
19  
20  
21  
22  
23  
24  
25  
26  
27  
28  
29  
30  
31  
32  
33  
34  
35  
36  
37  
38  
39  
40  
41  
42  
43  
44  
45  
46  
47  
48  
49  
50  
51  
52  
53  
54  
55  
56  
57  
58  
59  
60

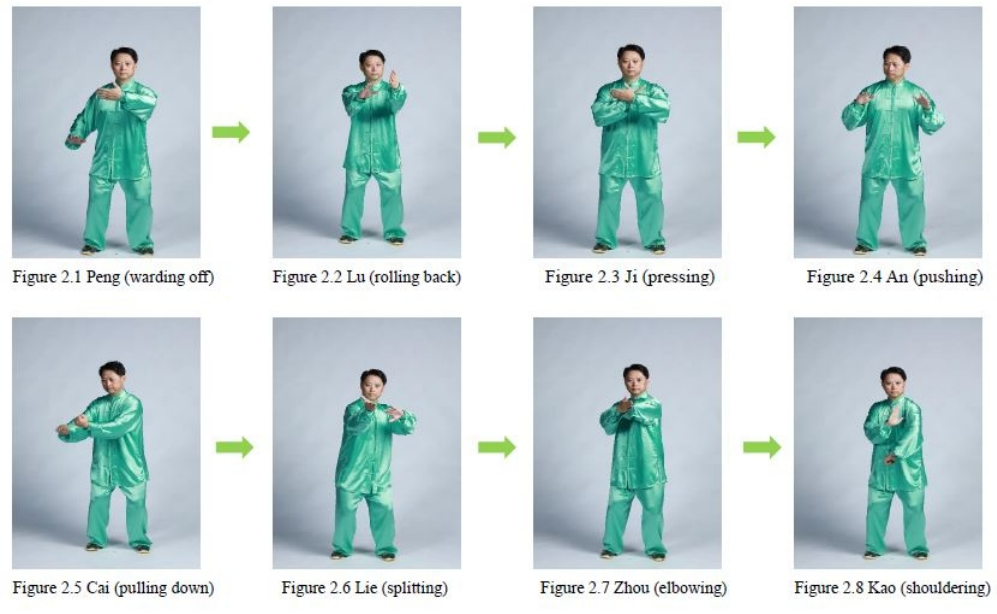

Figure. 2: Exemplary Bafa Wubu of Tai Chi; the pictures have taken the portrait right; the fugleman is the developer of TCCRP.

219x136mm (96 x 96 DPI)

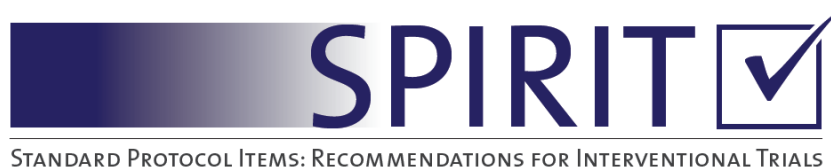

SPIRIT 2013 Checklist: Recommended items to address in a clinical trial protocol and related documents\*

| Section/item                          | Item No | Description                                                                                                                                                                                                                                                                              |
|---------------------------------------|---------|------------------------------------------------------------------------------------------------------------------------------------------------------------------------------------------------------------------------------------------------------------------------------------------|
| <b>Administrative information</b>     |         |                                                                                                                                                                                                                                                                                          |
| Title (P1)                            | 1       | Descriptive title identifying the study design, population, interventions, and, if applicable, trial acronym                                                                                                                                                                             |
| Trial registration (P7)               | 2a      | Trial identifier and registry name. If not yet registered, name of intended registry                                                                                                                                                                                                     |
|                                       | 2b      | All items from the World Health Organization Trial Registration Data Set                                                                                                                                                                                                                 |
| Protocol version (P7)                 | 3       | Date and version identifier                                                                                                                                                                                                                                                              |
| Funding (P23)                         | 4       | Sources and types of financial, material, and other support                                                                                                                                                                                                                              |
| Roles and responsibilities (P22)      | 5a      | Names, affiliations, and roles of protocol contributors                                                                                                                                                                                                                                  |
|                                       | 5b      | Name and contact information for the trial sponsor                                                                                                                                                                                                                                       |
|                                       | 5c      | Role of study sponsor and funders, if any, in study design; collection, management, analysis, and interpretation of data; writing of the report; and the decision to submit the report for publication, including whether they will have ultimate authority over any of these activities |
|                                       | 5d      | Composition, roles, and responsibilities of the coordinating centre, steering committee, endpoint adjudication committee, data management team, and other individuals or groups overseeing the trial, if applicable (see Item 21a for data monitoring committee)                         |
| <b>Introduction</b>                   |         |                                                                                                                                                                                                                                                                                          |
| Background and rationale (P5, P6, P7) | 6a      | Description of research question and justification for undertaking the trial, including summary of relevant studies (published and unpublished) examining benefits and harms for each intervention                                                                                       |
|                                       | 6b      | Explanation for choice of comparators                                                                                                                                                                                                                                                    |
| Objectives (P6, P7)                   | 7       | Specific objectives or hypotheses                                                                                                                                                                                                                                                        |

1  
2 Trial design 8 Description of trial design including type of trial (eg, parallel group,  
3 (P7) crossover, factorial, single group), allocation ratio, and framework (eg,  
4 superiority, equivalence, noninferiority, exploratory)  
5  
6  
7

### 8 **Methods: Participants, interventions, and outcomes**

9  
10 Study setting 9 Description of study settings (eg, community clinic, academic hospital)  
11 (P9) and list of countries where data will be collected. Reference to where  
12 list of study sites can be obtained  
13

14 Eligibility criteria 10 Inclusion and exclusion criteria for participants. If applicable, eligibility  
15 (P8, P9) criteria for study centres and individuals who will perform the  
16 interventions (eg, surgeons, psychotherapists)  
17

18  
19 Interventions 11a Interventions for each group with sufficient detail to allow replication,  
20 (P10, P11, P12, P1 including how and when they will be administered  
21 3)

22 11b Criteria for discontinuing or modifying allocated interventions for a  
23 given trial participant (eg, drug dose change in response to harms,  
24 participant request, or improving/worsening disease)  
25

26 11c Strategies to improve adherence to intervention protocols, and any  
27 procedures for monitoring adherence (eg, drug tablet return,  
28 laboratory tests)  
29

30 11d Relevant concomitant care and interventions that are permitted or  
31 prohibited during the trial  
32  
33

34 Outcomes 12 Primary, secondary, and other outcomes, including the specific  
35 (P13, P14, P15, P1 measurement variable (eg, systolic blood pressure), analysis metric  
36 6) (eg, change from baseline, final value, time to event), method of  
37 aggregation (eg, median, proportion), and time point for each  
38 outcome. Explanation of the clinical relevance of chosen efficacy and  
39 harm outcomes is strongly recommended  
40  
41

42 Participant 13 Time schedule of enrolment, interventions (including any run-ins and  
43 timeline (P7) washouts), assessments, and visits for participants. A schematic  
44 diagram is highly recommended (see Figure)  
45

46 Sample size 14 Estimated number of participants needed to achieve study objectives  
47 (P7, P8) and how it was determined, including clinical and statistical  
48 assumptions supporting any sample size calculations  
49

50  
51 Recruitment 15 Strategies for achieving adequate participant enrolment to reach  
52 (P9) target sample size  
53

### 54 **Methods: Assignment of interventions (for controlled trials)**

55  
56 Allocation:  
57  
58  
59  
60

|    |                |     |                                                                         |
|----|----------------|-----|-------------------------------------------------------------------------|
| 1  |                |     |                                                                         |
| 2  | Sequence       | 16a | Method of generating the allocation sequence (eg, computer-             |
| 3  | generation     |     | generated random numbers), and list of any factors for stratification.  |
| 4  | (P9)           |     | To reduce predictability of a random sequence, details of any planned   |
| 5  |                |     | restriction (eg, blocking) should be provided in a separate document    |
| 6  |                |     | that is unavailable to those who enrol participants or assign           |
| 7  |                |     | interventions                                                           |
| 8  |                |     |                                                                         |
| 9  |                |     |                                                                         |
| 10 | Allocation     | 16b | Mechanism of implementing the allocation sequence (eg, central          |
| 11 | concealment    |     | telephone; sequentially numbered, opaque, sealed envelopes),            |
| 12 | mechanism      |     | describing any steps to conceal the sequence until interventions are    |
| 13 | (P9)           |     | assigned                                                                |
| 14 |                |     |                                                                         |
| 15 | Implementation | 16c | Who will generate the allocation sequence, who will enrol participants, |
| 16 | (P9)           |     | and who will assign participants to interventions                       |
| 17 |                |     |                                                                         |
| 18 | Blinding       | 17a | Who will be blinded after assignment to interventions (eg, trial        |
| 19 | (masking)      |     | participants, care providers, outcome assessors, data analysts), and    |
| 20 | (P9, P10)      |     | how                                                                     |
| 21 |                |     |                                                                         |
| 22 |                | 17b | If blinded, circumstances under which unblinding is permissible, and    |
| 23 |                |     | procedure for revealing a participant's allocated intervention during   |
| 24 |                |     | the trial                                                               |
| 25 |                |     |                                                                         |
| 26 |                |     |                                                                         |
| 27 |                |     |                                                                         |

### Methods: Data collection, management, and analysis

|    |                 |     |                                                                          |
|----|-----------------|-----|--------------------------------------------------------------------------|
| 28 |                 |     |                                                                          |
| 29 |                 |     |                                                                          |
| 30 | Data collection | 18a | Plans for assessment and collection of outcome, baseline, and other      |
| 31 | methods (P17)   |     | trial data, including any related processes to promote data quality (eg, |
| 32 |                 |     | duplicate measurements, training of assessors) and a description of      |
| 33 |                 |     | study instruments (eg, questionnaires, laboratory tests) along with      |
| 34 |                 |     | their reliability and validity, if known. Reference to where data        |
| 35 |                 |     | collection forms can be found, if not in the protocol                    |
| 36 |                 |     |                                                                          |
| 37 |                 |     |                                                                          |
| 38 |                 | 18b | Plans to promote participant retention and complete follow-up,           |
| 39 |                 |     | including list of any outcome data to be collected for participants who  |
| 40 |                 |     | discontinue or deviate from intervention protocols                       |
| 41 |                 |     |                                                                          |
| 42 | Data            | 19  | Plans for data entry, coding, security, and storage, including any       |
| 43 | management      |     | related processes to promote data quality (eg, double data entry;        |
| 44 | (P17)           |     | range checks for data values). Reference to where details of data        |
| 45 |                 |     | management procedures can be found, if not in the protocol               |
| 46 |                 |     |                                                                          |
| 47 |                 |     |                                                                          |
| 48 | Statistical     | 20a | Statistical methods for analysing primary and secondary outcomes.        |
| 49 | methods         |     | Reference to where other details of the statistical analysis plan can be |
| 50 | (P18, P19)      |     | found, if not in the protocol                                            |
| 51 |                 |     |                                                                          |
| 52 |                 | 20b | Methods for any additional analyses (eg, subgroup and adjusted           |
| 53 |                 |     | analyses)                                                                |
| 54 |                 |     |                                                                          |
| 55 |                 | 20c | Definition of analysis population relating to protocol non-adherence     |
| 56 |                 |     | (eg, as randomised analysis), and any statistical methods to handle      |
| 57 |                 |     | missing data (eg, multiple imputation)                                   |
| 58 |                 |     |                                                                          |
| 59 |                 |     |                                                                          |
| 60 |                 |     |                                                                          |

## Methods: Monitoring

|                               |     |                                                                                                                                                                                                                                                                                                                                       |
|-------------------------------|-----|---------------------------------------------------------------------------------------------------------------------------------------------------------------------------------------------------------------------------------------------------------------------------------------------------------------------------------------|
| Data monitoring<br>(P17, P18) | 21a | Composition of data monitoring committee (DMC); summary of its role and reporting structure; statement of whether it is independent from the sponsor and competing interests; and reference to where further details about its charter can be found, if not in the protocol. Alternatively, an explanation of why a DMC is not needed |
|                               | 21b | Description of any interim analyses and stopping guidelines, including who will have access to these interim results and make the final decision to terminate the trial                                                                                                                                                               |
| Harms (P17)                   | 22  | Plans for collecting, assessing, reporting, and managing solicited and spontaneously reported adverse events and other unintended effects of trial interventions or trial conduct                                                                                                                                                     |
| Auditing(P18)                 | 23  | Frequency and procedures for auditing trial conduct, if any, and whether the process will be independent from investigators and the sponsor                                                                                                                                                                                           |

## Ethics and dissemination

|                                    |     |                                                                                                                                                                                                                                  |
|------------------------------------|-----|----------------------------------------------------------------------------------------------------------------------------------------------------------------------------------------------------------------------------------|
| Research ethics approval (P19)     | 24  | Plans for seeking research ethics committee/institutional review board (REC/IRB) approval                                                                                                                                        |
| Protocol amendments(P18)           | 25  | Plans for communicating important protocol modifications (eg, changes to eligibility criteria, outcomes, analyses) to relevant parties (eg, investigators, REC/IRBs, trial participants, trial registries, journals, regulators) |
| Consent or assent(P9)              | 26a | Who will obtain informed consent or assent from potential trial participants or authorised surrogates, and how (see Item 32)                                                                                                     |
|                                    | 26b | Additional consent provisions for collection and use of participant data and biological specimens in ancillary studies, if applicable                                                                                            |
| Confidentiality (P17, P18)         | 27  | How personal information about potential and enrolled participants will be collected, shared, and maintained in order to protect confidentiality before, during, and after the trial                                             |
| Declaration of interests (P23)     | 28  | Financial and other competing interests for principal investigators for the overall trial and each study site                                                                                                                    |
| Access to data (P23, P24)          | 29  | Statement of who will have access to the final trial dataset, and disclosure of contractual agreements that limit such access for investigators                                                                                  |
| Ancillary and post-trial care(P19) | 30  | Provisions, if any, for ancillary and post-trial care, and for compensation to those who suffer harm from trial participation                                                                                                    |

- 1  
2  
3  
4  
5  
6  
7  
8  
9  
10  
11  
12  
13
- |                               |     |                                                                                                                                                                                                                                                                                     |
|-------------------------------|-----|-------------------------------------------------------------------------------------------------------------------------------------------------------------------------------------------------------------------------------------------------------------------------------------|
| Dissemination<br>policy (P20) | 31a | Plans for investigators and sponsor to communicate trial results to participants, healthcare professionals, the public, and other relevant groups (eg, via publication, reporting in results databases, or other data sharing arrangements), including any publication restrictions |
|                               | 31b | Authorship eligibility guidelines and any intended use of professional writers                                                                                                                                                                                                      |
|                               | 31c | Plans, if any, for granting public access to the full protocol, participant-level dataset, and statistical code                                                                                                                                                                     |

## 14 Appendices

- 15  
16  
17  
18  
19  
20  
21  
22  
23  
24
- |                                        |    |                                                                                                                                                                                                |
|----------------------------------------|----|------------------------------------------------------------------------------------------------------------------------------------------------------------------------------------------------|
| Informed consent<br>materials<br>(P19) | 32 | Model consent form and other related documentation given to participants and authorised surrogates                                                                                             |
| Biological<br>specimens                | 33 | Plans for collection, laboratory evaluation, and storage of biological specimens for genetic or molecular analysis in the current trial and for future use in ancillary studies, if applicable |

---

25 \*It is strongly recommended that this checklist be read in conjunction with the SPIRIT 2013  
26 Explanation & Elaboration for important clarification on the items. Amendments to the  
27 protocol should be tracked and dated. The SPIRIT checklist is copyrighted by the SPIRIT  
28 Group under the Creative Commons "[Attribution-NonCommercial-NoDerivs 3.0 Unported](https://creativecommons.org/licenses/by-nc-nd/3.0/)"  
29 license.  
30  
31  
32  
33  
34  
35  
36  
37  
38  
39  
40  
41  
42  
43  
44  
45  
46  
47  
48  
49  
50  
51  
52  
53  
54  
55  
56  
57  
58  
59  
60
